1  
2  
3  
4  
5  
6  
7  
8  
9  
10  
11  
12  
13  
14  
15  
16  
17  
18  
19  
20  
21  
22  
23  
24  
25  
26  
27  
28  
29  
30  
31  
32  
33

# **Glutamatergic drive along the septo-temporal axis of hippocampus boosts prelimbic oscillations in the neonatal mouse**

**Joachim Ahlbeck, Lingzhen Song, Mattia Chini, Antonio Candela,  
Sebastian H. Bitzenhofer & Ileana L. Hanganu-Opatz**

*<sup>1</sup>Developmental Neurophysiology, Institute of Neuroanatomy, University Medical  
Center Hamburg-Eppendorf, 20251 Hamburg, Germany*

Corresponding author: Ileana L. Hanganu-Opatz  
Dev. Neurophysiology  
Institute of Neuroanatomy  
University Medical Center Hamburg-Eppendorf  
Falkrenried 94  
20251 Hamburg  
Germany  
phone: +49 40 7410 58966  
fax: +49 40 7410 58925  
e-mail: hangop@zmnh.uni-hamburg.de

Figures: 5  
Number of pages: 35  
Supplemental Material: 4 figures  
Number of words in Summary: 149  
Number of words in Introduction: 594  
Number of words in Discussion: 1767

34 **SUMMARY**

35 The long-range coupling within prefrontal-hippocampal networks that account for cognitive  
36 performance emerges early in life. The discontinuous hippocampal theta bursts have been  
37 proposed to drive the generation of neonatal prefrontal oscillations, yet the cellular substrate  
38 of these early interactions is still unresolved. Here, we selectively target optogenetic  
39 manipulation of glutamatergic projection neurons in the CA1 area of either dorsal or  
40 intermediate/ventral hippocampus at neonatal age to elucidate their contribution to the  
41 emergence of prefrontal oscillatory entrainment. We show that despite stronger theta and  
42 ripples power in dorsal hippocampus, the prefrontal cortex is mainly coupled with  
43 intermediate/ventral hippocampus by phase-locking of neuronal firing via dense direct axonal  
44 projections. Theta band-confined activation by light of pyramidal neurons in  
45 intermediate/ventral but not dorsal CA1 that were transfected by *in utero* electroporation with  
46 high-efficiency channelrhodopsin boosts prefrontal oscillations. Our data causally elucidates  
47 the cellular origin of the long-range coupling in the developing brain.

48 **Running title:**

49 Optogenetic interrogation of early long-range coupling

50 **Highlights:**

- 51 • Neonatal theta bursts, sharp waves and ripples vary along septo-temporal axis
- 52 • Hippocampal activity times prefrontal oscillations via direct axonal projections
- 53 • Selective hippocampal targeting along septo-temporal axis causes precise firing
- 54 • Light stimulation of hippocampal neurons at 8 Hz boosts prefrontal oscillations

55

56 **INTRODUCTION**

57 In the adult rodent brain, coordinated patterns of oscillatory activity code in a frequency  
58 specific manner for sensory and cognitive performance. For example, learning and memory  
59 critically depend on oscillations within theta frequency band (4-12 Hz) that functionally couple  
60 the medial prefrontal cortex (PFC) and hippocampus (HP) (Siapas and Wilson, 1998;  
61 Benchenane et al., 2010; Brincat and Miller, 2015; Backus et al., 2016; Eichenbaum, 2017;  
62 Wirt and Hyman, 2017). These frequency-tuned brain states are present already during early  
63 development, long before the emergence of cognitive abilities, and have been extensively  
64 characterized and categorized according to their spatial and temporal structure (Lindemann  
65 et al., 2016). Network oscillations during development have a highly discontinuous and  
66 fragmented structure with bursts of activity alternating with “silent” periods (Hanganu et al.,  
67 2006; Seelke and Blumberg, 2010; Shen and Colonnese, 2016; Luhmann and Khazipov,  
68 2017). The most common oscillatory pattern, spindle bursts, synchronizes large cortical and  
69 subcortical networks within theta-alpha frequency range. It is accompanied by slow delta  
70 waves as well as by faster discharges (beta and gamma oscillations) that account for local  
71 activation of circuits.

72 In the absence of direct behavioral correlates, a mechanistic understanding of  
73 oscillatory rhythms in the developing brain is currently lacking. In sensory systems, spindle  
74 bursts have been proposed to act as a template facilitating the formation of cortical maps  
75 (Dupont et al., 2006; Hanganu et al., 2006; Tolner et al., 2012), whereas early gamma  
76 oscillations seem to control the organization of thalamocortical topography (Minlebaev et al.,  
77 2011; Khazipov et al., 2013). In limbic systems dedicated to mnemonic and executive  
78 abilities, the knowledge on the relevance of early network oscillations is even sparser. Few  
79 lesion studies, yet without selectivity for specific activity patterns, suggested that prefrontal-  
80 hippocampal communication during development might be necessary for the maturation of  
81 episodic memory (Kruger et al., 2012). Temporal associations between the firing and  
82 synaptic discharges of individual neurons and network oscillations in different frequency  
83 bands gave first insights into the cellular substrate of coordinated activity in neonates.

84 Whereas in sensory systems, endogenous activation of sensory periphery drives entrainment  
85 of local circuitry through gap junction coupling as well as glutamatergic and GABAergic  
86 transmission (Dupont et al., 2006; Hanganu et al., 2006; Minlebaev et al., 2009), in  
87 developing prefrontal-hippocampal networks, the excitatory drive from the HP has been  
88 proposed to activate a complex layer- and frequency-specific interplay in the PFC  
89 (Brockmann et al., 2011; Bitzenhofer and Hanganu-Opatz, 2014; Bitzenhofer et al., 2015).

90 While most of this correlative evidence put forward the relevance of early oscillations  
91 beyond a simple epiphenomenal signature of developing networks, direct evidence for their  
92 causal contribution to circuit maturation is still missing. This is mainly due to the absence of a  
93 causal interrogation of developing networks, similarly to the investigations done in adult  
94 ones. Only recently the methodological difficulties related to area-, layer- and cell type-  
95 specific manipulations at neonatal age have been overcome (Bitzenhofer et al., 2017a;  
96 Bitzenhofer et al., 2017b). By these means, the local neuronal interplay generating beta-  
97 gamma oscillations in the PFC has been elucidated. However, the long-range coupling  
98 causing the activation of local prefrontal circuits is still unresolved. We previously proposed  
99 that the hippocampal CA1 area drives the oscillatory entrainment of PFC at neonatal age  
100 (Brockmann et al., 2011). Here, we developed a methodological approach to optically  
101 manipulate the neonatal HP along its septo-temporal axis. We provide causal evidence that  
102 theta frequency-specific activation of pyramidal neurons in the CA1 area of intermediate and  
103 ventral (i/vHP), but not of dorsal HP (dHP) elicits broad band oscillations in the PFC of  
104 neonatal mice via dense axonal projections.

105

## 106 **RESULTS**

### 107 ***Neonatal dorsal and intermediate / ventral hippocampus are differently entrained in*** 108 ***discontinuous patterns of oscillatory activity***

109 While different organization and function of dHP vs. i/vHP of adults have been extensively  
110 characterized (Thompson et al., 2008; Dong et al., 2009; Patel et al., 2013), their patterns of  
111 structural and functional maturation are still poorly understood. To fill this knowledge gap, we

112 firstly examined the network oscillatory and firing activity of CA1 area of either dHP or i/vHP  
113 by performing extracellular recordings of the local field potential (LFP) and multiple unit  
114 activity (MUA) in neonatal [postnatal day (P) 8-10] non-anesthetized and urethane-  
115 anesthetized mice (n=153). While urethane anesthesia led to an overall decrease of  
116 amplitude and power of oscillatory activity when compared to the non-anesthetized state of  
117 the same group of pups, the firing rate and timing as well as the synchrony and interactions  
118 within prefrontal-hippocampal networks were similar during both states (Figure S1). Due to  
119 the close proximity and the absence of reliable anatomical and functional borders between  
120 iHP and vHP at neonatal age, data from the two areas were pooled and referred as from  
121 i/vHP. The entire investigation was performed at the age of initiation of coupling between HP  
122 and PFC, i.e. P8-10 (Brockmann et al., 2011). Independent of the position along the dorsal-  
123 ventral axis, the CA1 area was characterized by discontinuous oscillations with main  
124 frequency in theta band (4-12 Hz) and irregular low amplitude beta-gamma band  
125 components, which have been previously categorized as theta oscillations (Brockmann et al.,  
126 2011). They were accompanied by prominent sharp-waves (SPWs) reversing across the  
127 pyramidal layer (str. pyr.) and by strong MUA discharge (Figures 1A, 1E). While the general  
128 patterns of activity were similar in dHP and i/vHP, their properties significantly differed  
129 between the sub-divisions. The theta bursts in i/vHP had significantly higher occurrence  
130 (i/vHP:  $8.1 \pm 0.2$  oscillations/min, n=103 mice vs. dHP:  $5.2 \pm 0.3$  oscillations/min, n=41 mice;  
131  $p < 0.001$ ), larger amplitude (i/vHP:  $110.6 \pm 5.6$   $\mu$ V vs. dHP:  $92.9 \pm 2.6$   $\mu$ V;  $p = 0.015$ ), and  
132 shorter duration (i/vHP:  $3.5 \pm 0.1$  s vs. dHP:  $4.3 \pm 0.1$  s,  $p < 0.001$ ) when compared with dHP  
133 (Figures 1B, S2A). Investigation of the spectral composition of theta bursts revealed  
134 significant differences within theta band with a stronger activation of dHP (relative power:  
135 dHP:  $13.0 \pm 1.3$ , n=41 mice; i/vHP:  $10.3 \pm 0.5$ , n=103 mice;  $p = 0.026$ ), whereas the faster  
136 frequency components were similar along the septo-temporal axis (relative power: 12-30 Hz:  
137 dHP,  $15.0 \pm 1.6$ , n=41 mice; i/vHP,  $13.2 \pm 0.7$ , n=103 mice,  $p = 0.22$ ; 30-100 Hz: dHP,  $6.3 \pm$   
138  $0.6$ , n=41 mice; i/vHP:  $5.2 \pm 0.3$ , n=103 mice;  $p = 0.073$ ) (Figures 1C, S2B).

139 Differences along the septo-temporal axis were detected both in hippocampal spiking  
140 and population events SPWs. Overall, pyramidal neurons in i/vHP fired at higher rates ( $0.45$   
141  $\pm 0.01$  Hz,  $n=557$  units from 103 mice) than in the dHP ( $0.35 \pm 0.02$  Hz,  $n=158$  units from 41  
142 mice;  $p=0.025$ ) (Figure 1D). Similar to adult HP (Patel et al., 2013), SPW in neonatal HP  
143 were more prominent in the dHP ( $712.8 \pm 31.5$   $\mu$ V,  $n=41$  mice) when compared with those  
144 occurring in the i/vHP ( $223.8 \pm 6.3$   $\mu$ V,  $n=103$  mice,  $p<0.001$ ), yet their occurrence increased  
145 along the septo-temporal axis (dHP:  $6.6 \pm 0.5$ ,  $n=41$  mice; i/vHP:  $8.6 \pm 0.2$ ,  $n=103$  mice,  
146  $p<0.001$ ) (Figures 1E, 1F). In line with our previous results (Brockmann et al., 2011), SPWs  
147 were accompanied by prominent firing centered around the SPW peak (dHP, 232 units;  
148 i/vHP, 670 units) that were phase-locked to hippocampal ripples (Figure S2C). The power of  
149 ripples decreased along the septo-temporal axis (relative power: dHP,  $24.4 \pm 3.3$ ,  $n=41$  mice;  
150 i/vHP,  $6.1 \pm 0.60$ ,  $n=103$  mice,  $p<0.001$ ) (Figures 1G, H). Similarly, the ripple-related spiking  
151 was stronger in dHP when compared with i/vHP (peak firing: dHP:  $1.13 \pm 0.09$  Hz,  $n=232$   
152 units; i/vHP  $0.84 \pm 0.03$ ,  $n=670$ ,  $p<0.001$ ) (Figures 1I, 1J).

153 These data show that the activity patterns in the dorsal and intermediate / ventral CA1  
154 area differ in their properties and spectral structure.

155

156 ***Theta activity within dorsal and intermediate / ventral hippocampus differently***  
157 ***entrains the neonatal prelimbic cortex***

158 The different properties of network and neuronal activity in dHP vs. i/vHP led us to question  
159 their outcome for the long-range coupling in the developing brain. Past studies identified tight  
160 interactions between HP and PFC, which emerge already at neonatal age (Brockmann et al.,  
161 2011; Hartung et al., 2016) and are in support of memory at adulthood (Kruger et al., 2012;  
162 Spellman et al., 2015; Place et al., 2016). The discontinuous theta oscillations in HP have  
163 been proposed to drive the activation of local circuits in the PFC. To assess the coupling of  
164 dHP and i/vHP with PFC, we recorded simultaneously LFP and MUA in the corresponding  
165 hippocampal CA1 area and the prelimbic subdivision (PL) of the PFC of P8-10 mice. The  
166 entire investigation focused on PL, since in adults it is the prefrontal subdivision with the  
167 most dense innervation from HP (Jay and Witter, 1991; Vertes et al., 2007). In a first step, we

168 examined the temporal correspondence of discontinuous oscillations recorded  
169 simultaneously in the PL and dHP, as well as in the PL and i/vHP. We previously  
170 characterized the network activity in the PL and showed that spindle-shaped oscillations  
171 switching between theta (4-12 Hz) and beta-gamma (12-40 Hz) frequency components  
172 alternate with periods of silence (Brockmann et al., 2011; Cichon et al., 2014; Bitzenhofer et  
173 al., 2015). The majority of prelimbic and hippocampal oscillations co-occurred within a  
174 narrow time window (Figure 2A). The temporal synchrony between prelimbic and  
175 hippocampal oscillations was assessed by performing spectral coherence analysis (Figure  
176 2B). The results revealed a stronger coupling for PL-i/vHP (4-12 Hz:  $0.17 \pm 0.0069$ ; 12-30  
177 Hz:  $0.31 \pm 0.011$ ; 30-100 Hz:  $0.11 \pm 0.0069$ ,  $n=103$  mice) when compared with PL-dHP (4-12  
178 Hz:  $0.12 \pm 0.0081$ ; 12-30 Hz:  $0.18 \pm 0.0094$ ; 30-100 Hz:  $0.084 \pm 0.004$ ,  $n=41$  mice). In line  
179 with previous investigations, this level of coherence is a genuine feature of investigated  
180 neonatal networks and not the result of non-specific and conduction synchrony, since we  
181 considered only the imaginary component of the coherence spectrum, which excludes zero  
182 time-lag synchronization (Nolte et al., 2004).

183         Due to the symmetric interdependence of coherence, it does not offer reliable insights  
184 into the information flow between two brain areas. Therefore, in a second step, we estimated  
185 the strength of directed interactions between PL and HP by calculating the generalized  
186 partial directed coherence (gPDC) (Baccala et al., 2007; Rodrigues and Baccala, 2016)  
187 (Figure 2C). The method bases on the notion of Granger causality (Granger, 1980) and  
188 avoids distorted connectivity results due to different scaling of data in HP and PL (Baccala et  
189 al., 2007; Taxidis et al., 2010). Independent of the position along the septo-temporal axis, the  
190 information flow in theta or beta frequency band from either dorsal or intermediate/ventral HP  
191 to PL was significantly stronger than in the opposite direction. However, mean gPDC values  
192 for i/vHP  $\rightarrow$  PL were significantly ( $p<0.001$ ) higher ( $0.069 \pm 0.003$ ,  $n=103$  mice) when  
193 compared with those for dHP  $\rightarrow$  PL ( $0.053 \pm 0.003$ ,  $n=41$  mice). The stronger information  
194 flow from i/vHP to PL was confined to theta frequency range and was not detected for 12-30  
195 Hz frequencies (i/vHP  $\rightarrow$  PL:  $0.048 \pm 0.001$ ; dHP  $\rightarrow$  PL:  $0.043 \pm 0.002$ ,  $p=0.16$ ).

196 Correspondingly, the firing of individual prelimbic neurons was precisely timed by the phase  
197 of oscillations in i/vHP but not dHP (Figure 2D). Almost 20% of clustered units (52 out of 310  
198 units) were locked to theta phase in i/vHP, whereas only 6.5% of units (3 out of 46 units)  
199 were timed by dHP. The low number of locked cells in dHP precluded the comparison of  
200 coupling strength between the two hippocampal sub-divisions.

201 These results indicate that the distinct activity patterns in dHP and i/vHP at neonatal  
202 age have different outcomes in their coupling with the PL. Despite higher power, theta  
203 oscillations in dHP do not substantially account for prelimbic activity. In contrast, i/vHP  
204 seems to drive neuronal firing and network entrainment in the PL.

205

206 ***SPWs-mediated output of intermediate / ventral but not dorsal hippocampus times***  
207 ***network oscillations and spiking response in the neonatal prelimbic cortex***

208 Since SPWs and ripples in dHP significantly differ from those in i/vHP, they might have a  
209 distinct impact on the developing PFC. While abundant literature documented the  
210 contribution of SPWs-spindles complex to memory-relevant processing in downstream  
211 targets, such as PFC (Colgin, 2011; Buzsaki, 2015; Colgin, 2016), it is unknown how these  
212 complexes affect the development of cortical activation. Simultaneous recordings from  
213 neonatal CA1 area either in dHP or i/vHP and PL showed that already at neonatal age,  
214 prefrontal oscillations are generated shortly (~100 ms) after hippocampal SPWs - ripples.  
215 This prelimbic activation is significantly stronger when induced by SPWs-ripples emerging in  
216 i/vHP than in dHP as reflected by the significantly higher power of oscillatory activity in theta  
217 (PL for dHP:  $186.9 \pm 12.5 \mu\text{V}^2$ ; PL for i/vHP:  $249.5 \pm 14.5 \mu\text{V}^2$ ,  $p=0.0088$ ), beta (PL for dHP:  
218  $34.3 \pm 3.3 \mu\text{V}^2$ ; PL for i/vHP:  $48.1 \pm 2.8 \mu\text{V}^2$ ,  $p=0.0049$ ), and gamma (PL for dHP:  $11.3 \pm 0.9$   
219  $\mu\text{V}^2$ ; PL for i/vHP:  $17.4 \pm 1.2 \mu\text{V}^2$ ,  $p=0.0026$ ) frequency band (Figure 3A). The SPWs-ripple-  
220 induced oscillatory activity in the PL of neonatal mice was accompanied by augmentation of  
221 firing rates. While the induced firing in i/vHP peaked ( $\approx 90$  ms) after SPWs-ripples and  
222 remained significantly ( $p<0.001$ ) elevated for several seconds, a less prominent peak was  
223 observed following SPW-ripples in dHP (Figures 3B, 3C).



224           These data reveal that SPWs-ripples from intermediate / ventral but less from the  
225 dorsal part of hippocampal CA1 correlate with pronounced neuronal firing and local  
226 entrainment in the PL of neonatal mice.

227

228   ***Pyramidal neurons in intermediate / ventral but not dorsal hippocampus densely***  
229   ***project to the prefrontal cortex at neonatal age***

230 To identify the anatomical substrate of different coupling strength between i/vHP - PL and  
231 dHP - PL, we monitored the projections that originate from the CA1 area in both hippocampal  
232 subdivisions and target the PFC. The direct unilateral projections from hippocampal CA1  
233 area to PL have been extensively investigated in adult brain (Swanson, 1981; Jay and Witter,  
234 1991; Vertes et al., 2007) and are present already at neonatal age (Brockmann et al., 2011;  
235 Hartung et al., 2016). We tested for sub-division specific differences by using retrograde and  
236 anterograde tracing. First, we injected unilaterally small amounts of the retrograde tracer  
237 Fluorogold (FG) into the PL of P7 mice (n=8 mice). Three days after FG injections, labeled  
238 cells were found in str. pyr. of CA1 in both dHP and i/vHP (Figure 4A). However, their density  
239 was significantly different ( $p < 0.001$ ); whereas in dHP very few cells were retrogradely labeled  
240 ( $0.15 \cdot 10^3 \pm 0.074 \cdot 10^3$  cells/mm<sup>2</sup>), a large proportion of pyramidal-shaped cells in the CA1  
241 area of i/vHP projects to PL ( $3.29 \cdot 10^3 \pm 0.19 \cdot 10^3$  cells/mm<sup>2</sup>).

242           Second, the preferential innervation of PL by pyramidal neurons from CA1 area of  
243 i/vHP was confirmed by anterograde staining with BDA (n=9 mice). Small amounts of BDA  
244 were injected into the CA1 area of i/vHP (Figure 4B). They led to labeling of the soma and  
245 arborized dendritic tree of pyramidal neurons in str. pyr. with the characteristic orientation of  
246 axons. In 7 out of 9 mice anterogradely-labeled axons were found in the PL, preferentially  
247 within its deep layers V and VI.

248           Thus, the dense axonal projections from CA1 area of i/vHP might represent the  
249 substrate of HP-induced oscillatory entrainment of prelimbic circuits.

250 **Selective light activation of pyramidal neurons in CA1 area of intermediate / ventral**  
251 **but not dorsal hippocampus causes frequency-specific entrainment of neonatal**  
252 **prelimbic circuits**

253 The tight coupling by synchrony and the directed information flow from hippocampal CA1  
254 area to PL via direct axonal projections suggest that the HP acts already at neonatal age as  
255 a drive for prelimbic activation. Moreover, the differences identified between the dHP – PL  
256 and i/vHP – PL communication argue for prominent augmentation of driving force along the  
257 septo-temporal hippocampal axis. To causally confirm these correlative evidences, we  
258 selectively activated by light the pyramidal neurons in the CA1 area of either dHP or i/vHP  
259 that had been transfected with a highly efficient fast-kinetics double mutant ChR2E123T/  
260 T159C (ET/TC) (Berndt et al., 2011) and the red fluorescent protein tDimer2 by *in utero*  
261 electroporation (IUE) (Figure S3A). This method enables stable area and cell type-specific  
262 transfection of neurons already prenatally without the need of cell-type specific promoters of  
263 a sufficiently small size (Baumgart and Grebe, 2015; Szczurkowska et al., 2016). To target  
264 neurons along the septo-temporal axis, distinct transfection protocols were used. When the  
265 IUE was performed with two paddles placed 25° leftward angle from the midline and a 0°  
266 angle downward from anterior to posterior, tDimer-positive neurons were mainly found in the  
267 CA1 area of the dHP, as revealed by the analysis of consecutive coronal sections from IUE-  
268 transfected P8-10 mice. Targeting of i/vHP succeeded only when three paddles were used,  
269 with both positive poles located at 90° leftward angle from the midline and the third negative  
270 pole at 0° angle downward from anterior to posterior (Figures 5A, S2B). Staining with NeuN  
271 showed that a substantial proportion of neurons in str. pyr. of CA1 area (dHP:  $18.3 \pm 1.0\%$ ;  
272  $n=36$  slices from 13 mice; i/vHP:  $14.5 \pm 1.5\%$ ,  $n=12$  slices from 11 mice) were transfected by  
273 IUE. The shape of tDimer2-positive neurons, the orientation of primary dendrites, and the  
274 absence of positive staining for GABA confirmed that the light-sensitive protein ChR2(ET/TC)  
275 was integrated exclusively into cell lineages of pyramidal neurons (Figure 5A). Omission of  
276 ChR2(ET/TC) from the expression construct (i.e. opsin-free) yielded similar expression rates  
277 and distribution of tDimer2-positive neurons (Figure S3C).

278 To exclude non-specific effects of transfection procedure by IUE on the overall  
279 development of mice, we assessed the developmental milestones and reflexes of  
280 electroporated opsin-expressing and opsin-free mice (Figure S3D). While IUE caused  
281 significant reduction of litter size (non-electroporated  $6.5 \pm 0.7$  pups/litter, electroporated:  $4.5$   
282  $\pm 0.5$  pups/litter,  $p=0.017$ ), all investigated pups had similar body length, tail length, and  
283 weight during early postnatal period. Vibrissa placing, surface righting and cliff aversion  
284 reflexes were also not affected by IUE or transfection of neurons with opsins. These data  
285 indicate that the overall somatic development during embryonic and postnatal stage of  
286 ChR2(ET/TC)-transfected mice is unaltered.

287 We first assessed the efficiency of light stimulation in evoking action potentials in  
288 neonatal hippocampal neurons *in vivo*. Blue light pulses (473 nm, 20-40 mW/mm<sup>2</sup>) at  
289 different frequencies (4, 8, 16 Hz) led shortly (<10 ms) after the stimulus to precisely timed  
290 firing of transfected neurons in both dHP and i/vHP. Our previous experimental data and  
291 modeling work showed that the used light power did not cause local tissue heating that might  
292 interfere with neuronal spiking (Stujenske et al., 2015; Bitzenhofer et al., 2017b). For both  
293 hippocampal sub-divisions the efficiency of firing similarly decreased with augmenting  
294 frequency (Figure 5B). For stimulation frequencies >16 Hz, the firing lost the precise timing  
295 by light, most likely due to the immaturity of neurons and their projections.

296 To decide whether activation of HP drives frequency-specific oscillatory activity and  
297 boosts the entrainment of prelimbic circuits, we simultaneously performed multi-site  
298 recordings of LFP and MUA in PL and HP during pulsed light stimulation of CA1 area of dHP  
299 ( $n=22$  mice) or i/vHP ( $n=9$  mice) (Figure 5C). The firing in i/vHP timed by light at 8 Hz, but not  
300 at 4 Hz or 16 Hz, caused significant (theta:  $p=0.039$ , beta:  $p=0.030$ , gamma:  $p=0.0036$ )  
301 augmentation of oscillatory activity in all frequency bands as reflected by the higher power in  
302 the PL during the stimulation when compared with the time window before the train of pulses  
303 (Figure 5D, table 1). In contrast, stimulation by light of dHP left the prelimbic activity  
304 unaffected. In opsin-free animals, stimulation of dHP and i/vHP led to no significant changes  
305 in the oscillatory activity (Figure S4A, table 1). Rhythmic firing of prelimbic neurons was not

306 detected after light activation of hippocampal subdivisions, most likely because hippocampal  
307 axons mainly target the deep layers of PL (s. above) and the recordings were performed from  
308 layer II/III.

309 Thus, theta band entrainment of pyramidal neurons in the CA1 area of i/vHP but not  
310 dHP caused broad activation of local circuits in PL.

311

## 312 **DISCUSSION**

313 Combining selective optogenetic activation with extracellular recordings and tracing of  
314 projections in neonatal mice *in vivo*, we provide causal evidence that theta activity in the CA1  
315 area of i/vHP but not dHP drives network oscillations within developing prefrontal cortex.

316 Despite stronger theta power in the dHP, solely optical activation of the pyramidal neurons in  
317 i/vHP at theta frequency range (8 Hz) boosted the emergence of discontinuous oscillatory  
318 activity in theta and beta-gamma bands in the neonatal PFC. These data identifies the  
319 cellular substrate of the directed interactions between neonatal hippocampus and prefrontal  
320 cortex and offer new perspectives for the interrogation of long-range coupling in the  
321 developing brain and its behavioral readout.

322

## 323 ***Distinct patterns of functional maturation in dorsal and intermediate / ventral*** 324 ***hippocampus***

325 The abundant literature dedicated to the adult hippocampus mainly deals with a single  
326 cortical module (Amaral et al., 2007). However, an increasing number of studies in recent  
327 years revealed distinct organization, processing mechanisms and behavioral relevance for  
328 dHP vs. i/vHP (Fanselow and Dong, 2010; Bannerman et al., 2014; Strange et al., 2014). For  
329 example, the dHP, which receives dense projections from the entorhinal cortex (Witter and  
330 Amaral, 2004), is mainly involved in spatial navigation (O'Keefe and Nadel, 1978; Moser et  
331 al., 1995; Moser, 1998). In contrast, the ventral part receives strong cholinergic and  
332 dopaminergic innervation (Witter et al., 1989; Pitkanen et al., 2000) and contributes to  
333 processing of non-spatial information (Bannerman et al., 2003; Bast et al., 2009).  
334 Correspondingly, the network and neuronal activity changes along the septo-temporal axis.

335 The power of the most prominent activity pattern in the adult HP, the theta oscillations, as  
336 well as the theta timing of the neuronal firing was found to be substantially reduced in the  
337 i/vHP when compared with dHP (Royer et al., 2010). By these means, the precise spatial  
338 representation deteriorates along the septo-temporal axis, since theta activity is directly  
339 linked to place cell representation (O'Keefe and Recce, 1993; Geisler et al., 2007). In  
340 contrast, SPWs are more prominent and ripples have higher amplitude and frequency in the  
341 ventral HP than in the dHP (Patel et al., 2013).

342 Our data uncovered that some of these differences in the activity patterns along the  
343 septo-temporal axis emerge already during early neonatal development. Similar to findings  
344 from adult rodents, the power of theta bursts at neonatal age was higher in dHP than in  
345 i/vHP. The amplitude of SPWs and the power of ripples decreased along the septo-temporal  
346 axis. These findings give insights into the mechanisms underlying the early generation of  
347 activity patterns. It has been proposed that the differences in theta dynamics along the septo-  
348 temporal axis result from distinct innervation, on the one hand, and from specific intrinsic  
349 properties of hippocampal neurons, on the other hand. Cholinergic projections of different  
350 origin in the dHP and i/vHP (Stewart and Fox, 1990; Amaral et al., 2007) as well as  
351 maturational differences in the intrinsic resonant properties of hippocampal neurons and  
352 notable gradients of parvalbumin immunoreactivity along the septo-temporal axis (Honeycutt  
353 et al., 2016) may contribute to the observed differences.

354 Quantification along the septo-temporal axis revealed that, similar to adults, the  
355 occurrence of SPWs was higher in the i/vHP and their amplitude was larger in the neonatal  
356 dHP (Patel et al., 2013). It is still an issue of debate when exactly ripples emerge in the  
357 developing hippocampus, although it is obvious that they appear later than theta bursts and  
358 SPWs, most likely towards the end of the first and during second postnatal week (Buhl and  
359 Buzsaki, 2005; Brockmann et al., 2011). Their underlying mechanisms at neonatal age  
360 remain also largely unknown and need to be related to age-dependent changes in gap  
361 junctional coupling and GABA switch (Ben-Ari et al., 1989; Zhang et al., 1990; Yuste et al.,  
362 1995). The organization of SPWs and ripples is of particular relevance when considering

363 their impact on the early activity of PFC. Already at neonatal age, the prelimbic firing and  
364 oscillatory entrainment is timed by SPWs-ripples. Of note, the degree of timing varies along  
365 the septo-temporal axis and is much higher for the i/vHP.

366

367 ***Optogenetic interrogation of long-range coupling in the developing brain***

368 At adult age the communication between PFC and HP has been investigated in relationship  
369 with memory tasks both under physiological and disease-related conditions (Sirota et al.,  
370 2008; Adhikari et al., 2010; Sigurdsson et al., 2010; Eichenbaum, 2017). Depending on the  
371 phase of memory processing, the prefrontal-hippocampal coupling via oscillatory synchrony  
372 has been found to be either unidirectional from the HP to PFC or bidirectional (Siapas et al.,  
373 2005; Hallock et al., 2016; Place et al., 2016). Both theta and gamma network oscillations  
374 contribute to the functional long-range coupling. The model of prefrontal-hippocampal  
375 communication has been initially built based on experimental evidence correlating the  
376 temporal organization of neuronal and network activity in the two brain areas. The time delay  
377 between spike trains and oscillatory phase or between oscillations enabled to propose that  
378 the information flows in one direction or the other via mono- or polysynaptic axonal  
379 projections. More recently, a direct causal assessment of the coupling became possible  
380 through optogenetic interrogation of neural circuits. In a seminal study, Spellman and  
381 colleagues used light-driven inhibition of axonal terminals for dissecting the directionality of  
382 interactions between PFC and HP during different phases of memory retrieval (Spellman et  
383 al., 2015).

384 We previously showed that at neonatal age, long before the maturation of cognitive  
385 abilities, discontinuous theta bursts in i/vHP are temporally correlated to the network  
386 oscillations in the PFC and time the prefrontal firing (Brockmann et al., 2011; Hartung et al.,  
387 2016). Moreover, the temporal delay of 10-20 ms between prefrontal and hippocampal spike  
388 trains as well as the estimated directionality of information flow between the two areas  
389 suggested that hippocampal theta drives the oscillatory entrainment of the local circuits in the  
390 PFC. The present data directly prove this hypothesis, taking advantage of the recently

391 developed protocol for optogenetic manipulation of neuronal networks at neonatal age  
392 (Bitzenhofer et al., 2017a; Bitzenhofer et al., 2017b).

393         Several considerations regarding the technical challenges of optogenetic  
394 manipulation of HP along the septo-temporal axis need to be made. Besides the inherent  
395 difficulties related to the specificity of promoters for selective transfection and the targeting  
396 procedure that are ubiquitous for all developing networks and have been addressed  
397 elsewhere (Bitzenhofer et al., 2017a), confinement of light-sensitive proteins to pyramidal  
398 neurons of either dHP or i/vHP required special attention. In a previous study (Bitzenhofer et  
399 al., 2017b), we developed a selective targeting protocol of neonatal neurons that relies on  
400 the combination of CAG promoter and IUE. By these means, the expression of light-sensitive  
401 proteins in the neurons located in the neocortical layer and area of interest was sufficiently  
402 high to ensure their reliable activation. Similarly, the expression of ChR2(ET/TC) in the  
403 pyramidal neurons of hippocampal CA1 area under the CAG promoter was sufficiently high  
404 to reliably cause network and neuronal activity. Taking into account that viral transduction,  
405 which usually requires 10-14 days for stable expression, is only of limited usability to  
406 investigate local network interactions during development, IUE seems to represent the  
407 method of choice for manipulating circuits at this early age. IUE enables targeting of  
408 precursor cells of neuronal and glial subpopulations, based on their distinct spatial and  
409 temporal patterns of generation in the ventricular zone (Tabata and Nakajima, 2001; Borrell  
410 et al., 2005; Niwa et al., 2010; Hoerder-Suabedissen and Molnar, 2015). IUE based on 2  
411 electrode paddles enabled selective targeting of pyramidal neurons in the CA1 area of dHP  
412 in more than half of the pups per litter (Figure S3(i)), but it completely failed (0 out of 32  
413 mice) to target these neurons in i/vHP. Therefore, it was necessary to use a modified IUE  
414 protocol based on three electrodes. This protocol, although more complicated and time  
415 consuming, allows reliable transfection at brain locations that are only able to be sporadically  
416 targeted by two electrodes. The high IUE-induced expression of light sensitive proteins  
417 enables the reliable firing of neurons in both dHP and i/vHP in response to light pulses. One  
418 intriguing question is how many pyramidal neurons in str. pyr. of CA1 area must be

419 synchronously activated to drive the oscillatory entrainment of prelimbic circuitry.  
420 Anterograde and retrograde tracing demonstrated the density increase along the septo-  
421 temporal axis of hippocampal axons targeting the PL. Light activation / inhibition of these  
422 axonal terminals paired with monitoring of network oscillations in the PFC might offer  
423 valuable insights into the patterns of coupling sufficient for activation.

424

425 ***Functional relevance of frequency-specific drive within developing prefrontal-***  
426 ***hippocampal networks***

427 Abundant literature links theta frequency coupling within prefrontal-hippocampal networks to  
428 cognitive performance and emotional states of adults (Adhikari et al., 2010; Xu and Sudhof,  
429 2013; Spellman et al., 2015; Hallock et al., 2016; Place et al., 2016; Ye et al., 2017). The  
430 early emergence of directed communication between PFC and i/vHP raises the question of  
431 functional relevance of this early coupling during development and at adulthood.

432 The maturation of cognitive abilities is a process even more protracted than sensory  
433 development and starts during second-third postnatal week (Hanganu-Opatz, 2010; Cirelli  
434 and Tononi, 2015). Some of these abilities, such as recognition memory, can be easily  
435 monitored at early age and seems to critically rely on structurally and functionally intact  
436 prefrontal-hippocampal networks (Kruger et al., 2012). Direct assessment of the role of  
437 neonatal communication for memory performance as performed for adult circuits is  
438 impossible due to the temporal delay of the two processes. The alternative is to manipulate  
439 the activity of either PFC, HP or the connectivity between them during defined developmental  
440 time windows and monitor the juvenile and adult consequences at structural, functional and  
441 behavioral levels. The present data and optogenetic protocol represent the pre-requisite of  
442 this investigation, opening new perspectives for assessing the adult behavioral readout of  
443 long-range communication in the developing brain.

444 One question that remains to be addressed is how the hippocampal theta drive  
445 shapes the maturation of prefrontal-hippocampal networks. Following the general rules of  
446 activity-dependent plasticity (Hubel et al., 1977; Huberman et al., 2006); (Xu et al., 2011;



447 Yasuda et al., 2011), the precisely timed excitatory inputs from the i/vHP to the PL might  
448 facilitate the wiring of local prefrontal circuitry and enable the refinement of behaviorally  
449 relevant communication scaffold between the two regions. By these means, the prefrontal  
450 activity driven by projection neurons in the HP act as a template, having a pre-adaptive  
451 function that facilitates the tuning of circuits with regard to future conditions. This instructive  
452 role of theta activity for the prefrontal circuits needs to be proven by manipulation of temporal  
453 structure of the hippocampal drive without affecting the overall level of activity.  
454 Understanding the rules that govern the early organization of large-scale networks  
455 represents the pre-requisite for identifying the structural and functional deficits related to  
456 abnormal behavior and disease.

457

## 458 **MATERIALS AND METHODS**

### 459 **Experimental model and subject details**

460 *Mice.* All experiments were performed in compliance with the German laws and the  
461 guidelines of the European Community for the use of animals in research and were approved  
462 by the local ethical committee (111/12, 132/12). Timed-pregnant C57Bl/6J mice from the  
463 animal facility of the University Medical Center Hamburg-Eppendorf were housed individually  
464 in breeding cages at a 12 h light / 12 h dark cycle and fed *ad libitum*. The day of vaginal plug  
465 detection was defined E0.5, while the day of birth was assigned as P0. Both female and male  
466 mice underwent light stimulation and multi-site electrophysiological recordings at P8-10 after  
467 transfection with light-sensitive proteins by IUE at E15.5. For monitoring of projections,  
468 tracers were injected at P7 and monitored in their distribution along the axonal tracts at P10.

### 469 **Methods details**

#### 470 ***Surgical procedures***

471 *In utero electroporation.* Starting one day before and until two days after surgery, timed-  
472 pregnant C57Bl/6J mice received on a daily basis additional wet food supplemented with 2-4  
473 drops Metacam (0.5 mg/ml, Boehringer-Ingelheim, Germany). At E15.5 randomly assigned  
474 pregnant mice were injected subcutaneously with buprenorphine (0.05 mg/kg body weight)

475 30 min before surgery. The surgery was performed on a heating blanket and toe pinch and  
476 breathing were monitored throughout. Under isoflurane anesthesia (induction: 5%,  
477 maintenance: 3.5%) the eyes of the dam were covered with eye ointment to prevent damage  
478 before the uterine horns were exposed and moistened with warm sterile phosphate buffered  
479 saline (PBS, 37°C). Solution containing 1.25 µg/µl DNA [pAAV-CAG-ChR2(E123T/T159C)-  
480 2A-tDimer2, or pAAV-CAG-tDimer2)] (Figure S3A) and 0.1% fast green dye at a volume of  
481 0.75-1.25 µl were injected into the right lateral ventricle of individual embryos using pulled  
482 borosilicate glass capillaries with a sharp and long tip. Plasmid DNA was purified with  
483 NucleoBond (Macherey-Nagel, Germany). 2A encodes for a ribosomal skip sentence,  
484 splitting the fluorescent protein tDimer2 from the opsin during gene translation. Two different  
485 IUE protocols were used to target pyramidal neurons in CA1 area of either dHP or i/vHP. To  
486 target dHP, each embryo within the uterus was placed between the electroporation tweezer-  
487 type paddles (5 mm diameter, Protech, TX, USA) that were oriented at a 25° leftward angle  
488 from the midline and a 0° angle downward from anterior to posterior. Electrode pulses (35 V,  
489 50 ms) were applied five times at intervals of 950 ms controlled by an electroporator  
490 (CU21EX, BEX, Japan) (Figure S3B(i)) (Baumgart and Grebe, 2015). To target i/vHP, a tri-  
491 polar approach was used (Szczyrkowska et al., 2016). Each embryo within the uterus was  
492 placed between the electroporation tweezer-type paddles (5 mm diameter, both positive  
493 poles, Protech, TX, USA) that were oriented at 90° leftward angle from the midline and a 0°  
494 angle downward from anterior to posterior. A third custom build negative pole was positioned  
495 on top of the head roughly between the eyes. Electrode pulses (30 V, 50 ms) were applied  
496 six times at intervals of 950 ms controlled by an electroporator (CU21EX, BEX, Japan)  
497 (Figure S3B(ii)). By these means, neural precursor cells from the subventricular zone, which  
498 radially migrate into the HP, were transfected. Uterine horns were placed back into the  
499 abdominal cavity after electroporation. The abdominal cavity was filled with warm sterile PBS  
500 (37°C) and abdominal muscles and skin were sutured individually with absorbable and non-  
501 absorbable suture thread, respectively. After recovery, pregnant mice were returned to their  
502 home cages, which were half placed on a heating blanket for two days after surgery.

503 *Retrograde and anterograde tracing.* For retrograde tracing, mice were injected at P7 with  
504 Fluorogold (Fluorochrome, LLC, USA) unilaterally into the PFC using iontophoresis. The  
505 pups were placed in a stereotactic apparatus and kept under anesthesia with isoflurane  
506 (induction: 5%, maintenance: 2.5%) for the entire procedure. A 10 mm incision of the skin on  
507 the head was performed with small scissors. The bone above the PFC (0.5 mm anterior to  
508 bregma, 0.3 mm right to the midline) was carefully removed using a syringe. A glass capillary  
509 ( $\approx 20$   $\mu\text{m}$  tip diameter) was filled with  $\approx 1$   $\mu\text{L}$  of 5% Fluorogold diluted in sterile water by  
510 capillary forces, and a silver wire was inserted such that it was in contact with the Fluorogold  
511 solution. For anterograde tracing, mice were injected at P7 with the anterograde tracer  
512 biotinylated dextran amine (BDA) (Thermo Fisher Scientific, USA) unilaterally into i/vHP  
513 using iontophoresis and surgery protocols as described above. The bone above i/vHP (0.7  
514 mm anterior to lambda, 2-3 mm right to the midline) was carefully removed using a syringe. A  
515 glass capillary ( $\approx 30$   $\mu\text{m}$  tip diameter) was filled with  $\approx 1$   $\mu\text{L}$  of 5% BDA diluted in 0.125 M  
516 phosphate buffer by capillary forces, and a silver wire was inserted such that it was in contact  
517 with the BDA solution. For both anterograde and retrograde tracing, the positive pole of the  
518 iontophoresis device was attached to the silver wire, the negative one was attached to the  
519 skin of the neck. The capillary was carefully lowered into the PFC ( $\approx 1.5$  mm dorsal from the  
520 dura) or HP ( $\approx 1.5$  mm dorsal from the dura). Iontophoretically injection by applying anodal  
521 current to the pipette (6s on/off current pulses of 6  $\mu\text{A}$ ) was done for 5 min. Following  
522 injection, the pipette was left in place for at least 5 min and then slowly retracted. The scalp  
523 was closed by application of tissue adhesive glue and the pups were left on a heating pad for  
524 10-15 minutes to fully recover before they were given back to the mother. The pups were  
525 perfused at P10.

526 *Surgical preparation for acute electrophysiological recording and light delivery.* For  
527 recordings in non-anesthetized state, 0.5% bupivacain / 1% lidocaine was locally applied on  
528 the neck muscles. For recordings under anesthesia, mice were injected i.p. with urethane (1  
529 mg/g body weight; Sigma-Aldrich, MO, USA) prior to surgery. For both groups, under  
530 isoflurane anesthesia (induction: 5%, maintenance: 2.5%) the head of the pup was fixed into

531 a stereotaxic apparatus using two plastic bars mounted on the nasal and occipital bones with  
532 dental cement. The bone above the PFC (0.5 mm anterior to bregma, 0.5 mm right to the  
533 midline for layer V/VI), hippocampus (2.0 mm posterior to bregma, 1.0 mm right to the  
534 midline for dHP, 3.5 mm posterior to bregma, 3.5 mm right to the midline for i/vHP) was  
535 carefully removed by drilling a hole of <0.5 mm in diameter. After a 10-20 min recovery  
536 period on a heating blanket mice were moved to the setup for electrophysiological recording.  
537 Throughout the surgery and recording session the mouse was positioned on a heating pad  
538 with the temperature kept at 37°C.

539 *Perfusion.* Mice were anesthetized with 10% ketamine (aniMedica, Germany) / 2% xylazine  
540 (WDT, Germany) in 0.9% NaCl solution (10 µg/g body weight, i.p.) and transcardially  
541 perfused with Histofix (Carl Roth, Germany) containing 4% paraformaldehyde for 30-40  
542 minutes. Brains were postfixed in 4% paraformaldehyde for 24 h.

#### 543 ***Behavioral testing***

544 *Examination of developmental milestones.* Mouse pups were tested for their somatic  
545 development and reflexes at P2, P5 and P8. Weight, body and tail length were assessed.  
546 Surface righting reflex was quantified as time (max 30 s) until the pup turned over with all  
547 four feet on the ground after being placed on its back. Cliff aversion reflex was quantified as  
548 time (max 30 s) until the pup withdrew after snout and forepaws were positioned over an  
549 elevated edge. Vibrissa placing was rated positive if the pup turned its head after gently  
550 touching the whiskers with a toothpick.

#### 551 ***Electrophysiology***

552 *Electrophysiological recording.* A one-shank electrode (NeuroNexus, MI, USA) containing  
553 1x16 recording sites (0.4-0.8MΩ impedance, 100 µm spacing) was inserted into the PFC.  
554 One-shank optoelectrodes (NeuroNexus, MI, USA) containing 1x16 recordings sites (0.4-0.8  
555 MΩ impedance, 50 µm spacing) aligned with an optical fiber (105 µm diameter) ending 200  
556 µm above the top recording site was inserted into either dHP or i/vHP. A silver wire was  
557 inserted into the cerebellum and served as ground and reference electrode. A recovery  
558 period of 10 min following insertion of electrodes before acquisition of data was provided.

559 Extracellular signals were band-pass filtered (0.1-9,000 Hz) and digitized (32 kHz) with a  
560 multichannel extracellular amplifier (Digital Lynx SX; Neuralynx, Bozeman, MO, USA) and  
561 the Cheetah acquisition software (Neuralynx). Spontaneous (i.e. not induced by light  
562 stimulation) activity was recorded for 15 min at the beginning and end of each recording  
563 session as baseline activity. Only the baseline prior to stimulation epochs was used for data  
564 analysis.

565 *Light stimulation.* Pulsed (laser on-off) light stimulations were performed with an arduino uno  
566 (Arduino, Italy) controlled diode laser (473 nm; Omicron, Austria). Laser power was adjusted  
567 to trigger neuronal spiking in response to >25% of 3-ms-long light pulses at 16 Hz. Resulting  
568 light power was in the range of 20-40mW/mm<sup>2</sup> at the fiber tip. For each frequency used (4, 8  
569 and 16 Hz), stimuli (3 ms pulse length, 3 s stimulation duration, 6 s inter stimulation interval)  
570 were repeated (30 times) in a randomized order.

## 571 **Histology**

572 *Immunohistochemistry.* Brains were sectioned coronally at 50 µm. Free-floating slices were  
573 permeabilized and blocked with PBS containing 0.2 % Triton X 100 (Sigma-Aldrich, MO,  
574 USA), 10 % normal bovine serum (Jackson Immuno Research, PA, USA) and 0.02% sodium  
575 azide. Subsequently, slices were incubated overnight with mouse monoclonal Alexa Fluor-  
576 488 conjugated antibody against NeuN (1:200, MAB377X, Merck Millipore, MA, USA) or  
577 rabbit polyclonal primary antibody against GABA (1:1,000, A2052; Sigma-Aldrich), followed  
578 by 2 h incubation with Alexa Fluor-488 goat anti-rabbit IgG secondary antibody (1:500,  
579 A11008; Merck Millipore). Slices were transferred to glass slides and covered with  
580 Fluoromount (Sigma-Aldrich, MO, USA).

581 For 3,3'-diaminobenzidine (DAB) staining sections (prepared as described above) were rinsed  
582 in PBS (0.125 M, pH 7.4–7.6) for 10 min, treated with peroxide solution (3% peroxide, 10%  
583 methanol in 0.125 M PB) for 10 min to quench any endogenous peroxidases within the  
584 tissue, and rinsed again. Subsequently, the sections were washed in PBS containing 0.5%  
585 Triton-X and incubated with avidin biotinylated enzyme complex (ABC, VECTASTAIN ABC  
586 Kit, USA) at room temperature or overnight at 4°C. After rinsing in Tris-HCl (pH 7.4), the

587 sections were further incubated with DAB working buffer (DAB peroxidase substrate kit,  
588 Vector Laboratories, USA) at room temperature for 2-10 min. After the signal was detected,  
589 all sections were rinsed with Tris-HCl.

590 *Imaging.* Wide field fluorescence was performed to reconstruct the recording electrode  
591 position in brain slices of electrophysiologically investigated pups and to localize tDimer2  
592 expression in pups after IUE. High magnification images were acquired with a confocal  
593 microscope (DM IRBE, Leica, Germany) to quantify tDimer2 expression and immunopositive  
594 cells (1-4 brain slices / investigated mouse). For DAB staining, brightfield images were  
595 obtained using Zeiss imager M1 microscope (Zeiss, Oberkochen, Germany) and enhanced  
596 using the National Institutes of Health (NIH) Image program.

#### 597 **Quantification and statistical analysis**

598 *Immunohistochemistry quantification.* All images were similarly analyzed with ImageJ. For  
599 quantification of fluorogold tracing automatic cell counting was done using custom-written  
600 tools. To quantify tDimer2, NeuN and GABA-positive neurons, manual counting was  
601 performed, since the high neuronal density in str. pyr. prevented reliable automatic counting.

602 *Spectral analysis of LFP.* Data were imported and analyzed offline using custom-written tools  
603 in the Matlab environment (MathWorks). Data were processed as following: band-pass  
604 filtered (500–5,000 Hz) to analyze MUA and low-pass filtered (<1,400 Hz) using a third-order  
605 Butterworth filter before downsampling to 3.2 kHz to analyze LFP. All filtering procedures  
606 were performed in a manner preserving phase information.

607 *Detection of oscillatory activity.* The detection and of discontinuous patterns of activity in the  
608 neonatal PL and HP were performed using a modified version of the previously developed  
609 algorithm for unsupervised analysis of neonatal oscillations (Cichon et al., 2014) and  
610 confirmed by visual inspection. Briefly, deflections of the root mean square of band-pass  
611 filtered signals (1–100 Hz) exceeding a variance-dependent threshold were assigned as  
612 network oscillations. The threshold was determined by a Gaussian fit to the values ranging  
613 from 0 to the global maximum of the root-mean-square histogram. If two oscillations occurred

614 within 200 ms of each other they were considered as one. Only oscillations lasting > 1 s was  
615 included.

616 *Detection of sharpwaves.* Sharpwaves were detected by subtracting the filtered signal (1-300  
617 Hz) from the recording sites 100  $\mu\text{m}$  above and 100  $\mu\text{m}$  below the recording site in str. pyr.  
618 Sharpwaves were then detected as peaks above 5 times the standard deviation of the  
619 subtracted signal.

620 *Power spectral density.* Power spectral density was calculated using the Welch's method.  
621 Briefly, segments of the recorded signal were glued together (1 s segments for oscillatory  
622 activity; 300 ms segments for sharpwave pre/post comparison; 100 ms segments for ripple  
623 comparison; 3 s for light evoked activity) and power were then calculated using non-  
624 overlapping windows. Time–frequency plots were calculated by transforming the data using  
625 Morlet continuous wavelet.

626 *Coherence.* Coherence was calculated using the imaginary coherency method (Nolte et al.,  
627 2004). Briefly, the imaginary coherence was calculated by taking the imaginary component of  
628 the cross-spectral density between the two signals and normalized by the power spectral  
629 density of each. The computation of the imaginary coherence C over frequency (f) for the  
630 power spectral density P of signal X and Y was performed according to the formula:

631 
$$C_{XY}(f) = \text{Im} \left( \frac{|P_{XY}(f)|^2}{P_{XX}(f)P_{YY}(f)} \right)$$

632 *General partial directed coherence.* gPDC is based on linear Granger causality measure.  
633 The method attempts to describe the causal relationship between multivariate time series  
634 based on the decomposition of multivariate partial coherences computed from multivariate  
635 autoregressive models. The LFP signal was divided into segments containing the oscillatory  
636 activity. Signal was de-noised using wavelets with the Matlab wavelet toolbox. After de-  
637 noising, gPDC was calculated using the gPDC algorithm previously described (Baccala et al.,  
638 2007).

639 *Single unit activity analysis.* SUA was detected and clustered using Offline Sorter (Plexon,  
640 TC, USA). 1–4 single units were detected at each recording site. Subsequently, data were  
641 imported and analyzed using custom-written tools in the Matlab software (MathWorks). The  
642 firing rate temporally related to SPWs was calculated by aligning all units to the detected  
643 SPWs. For assessing the phase locking of units to LFP, we firstly used the Rayleigh test for  
644 non-uniformity of circular data to identify the units significantly locked to network oscillations.  
645 The phase was calculated by extracting the phase component using the Hilbert transform of  
646 the filtered signal at each detected spike. Spikes occurring in a 15 ms-long time window after  
647 the start of a light pulse were considered to be light-evoked. Stimulation efficacy was  
648 calculated as the probability of at least one spike occurring in this period.

649 *Statistical analysis.* Statistical analyses were performed using SPSS Statistics 21 (IBM, NY,  
650 USA) or Matlab. Data were tested for normal distribution by the Shapiro–Wilk test. Normally  
651 distributed data were tested for significant differences (\* $p < 0.05$ , \*\* $p < 0.01$  and \*\*\* $p < 0.001$ )  
652 using paired t-test, unpaired t-test or one-way repeated-measures analysis of variance with  
653 Bonferroni-corrected post hoc analysis. Not normally distributed data were tested with the  
654 nonparametric Mann–Whitney U-test. The circular statistics toolbox was used to test for  
655 significant differences in the phase locking data. Data are presented as mean  $\pm$  SEM. No  
656 statistical measures were used to estimate sample size since effect size was unknown.  
657 Investigators were not blinded to the group allocation during the experiments. Unsupervised  
658 analysis software was used if possible to preclude investigator biases. Summary of  
659 performed statistical analysis is summarized in table S1.

## 660 **Major datasets**

| <b>Author</b>   | <b>Year</b> | <b>Dataset title</b>                                                                                                            | <b>Dataset URL</b>                                                                    | <b>Database, license and accessibility information</b>                     |
|-----------------|-------------|---------------------------------------------------------------------------------------------------------------------------------|---------------------------------------------------------------------------------------|----------------------------------------------------------------------------|
| Ahlbeck et al., | 2017        | Data from: Glutamatergic drive along the septo-temporal axis of hippocampus boosts prelimbic oscillations in the neonatal mouse | <a href="https://doi.org/10.5061/dryad.52fh7">https://doi.org/10.5061/dryad.52fh7</a> | Available at Dryad Digital Repository under a CC0 Public Domain Dedication |

661

662



663

664 **Author contributions**

665 I.L.H.-O. designed the experiments, J.A., L.S., M.C., S.H.B. and A.C. carried out the  
666 experiments, J.A. and M.C., analyzed the data, I.L.H.-O. and J.A. interpreted the data and  
667 wrote the paper. All authors discussed and commented on the manuscript.

668

669 **Acknowledgments**

670 We thank Nadine Faesel for the establishment of tracing technique, Drs. L. Cancedda and A.  
671 Cwetsch for help with the *in utero* electroporation, Drs. S. Wiegert, T. Oertner, and C. Gee  
672 for help with the development of opsin constructs as well as A. Marquardt, P. Putthoff, A.  
673 Dahlmann and I. Ohmert for excellent technical assistance.

674 I.L.H.-O. acknowledges support by the ERC (ERC Consolidator Grant 681577) and by the  
675 German Research Foundation (SFB 936 (B5) and SPP 1665 (Ha4466/12-1)).

676 I.L.H.-O. is member of the FENS Kavli Network of Excellence.

677 *In memoriam of Howard Eichenbaum*

678

679 **Competing interests**

680 The authors declare no competing financial interests.

681

682 **REFERENCES**

- 683 Adhikari, A., Topiwala, M.A., and Gordon, J.A. (2010). Synchronized activity between the  
684 ventral hippocampus and the medial prefrontal cortex during anxiety. *Neuron* 65(2),  
685 257-269. doi: 10.1016/j.neuron.2009.12.002.
- 686 Amaral, D.G., Scharfman, H.E., and Lavenex, P. (2007). The dentate gyrus: fundamental  
687 neuroanatomical organization (dentate gyrus for dummies). *Prog Brain Res* 163, 3-  
688 22. doi: 10.1016/S0079-6123(07)63001-5.
- 689 Baccala, L.A., Sameshima, K., and Takahashi, D.Y. (Year). "Generalized Partial Directed  
690 Coherence", in: *2007 15th International Conference on Digital Signal Processing*,  
691 163-166.
- 692 Backus, A.R., Schoffelen, J.M., Szebenyi, S., Hanslmayr, S., and Doeller, C.F. (2016).  
693 Hippocampal-Prefrontal Theta Oscillations Support Memory Integration. *Curr Biol*  
694 26(4), 450-457. doi: 10.1016/j.cub.2015.12.048.
- 695 Bannerman, D.M., Grubb, M., Deacon, R.M.J., Yee, B.K., Feldon, J., and Rawlins, J.N.P.  
696 (2003). Ventral hippocampal lesions affect anxiety but not spatial learning.  
697 *Behavioural Brain Research* 139(1-2), 197-213. doi: 10.1016/s0166-4328(02)00268-  
698 1.
- 699 Bannerman, D.M., Sprengel, R., Sanderson, D.J., McHugh, S.B., Rawlins, J.N., Monyer, H.,  
700 et al. (2014). Hippocampal synaptic plasticity, spatial memory and anxiety. *Nat Rev*  
701 *Neurosci* 15(3), 181-192. doi: 10.1038/nrn3677.
- 702 Bast, T., Wilson, I.A., Witter, M.P., and Morris, R.G. (2009). From rapid place learning to  
703 behavioral performance: a key role for the intermediate hippocampus. *PLoS Biol* 7(4),  
704 e1000089. doi: 10.1371/journal.pbio.1000089.
- 705 Baumgart, J., and Grebe, N. (2015). C57BL/6-specific conditions for efficient in utero  
706 electroporation of the central nervous system. *J Neurosci Methods* 240, 116-124. doi:  
707 10.1016/j.jneumeth.2014.11.004.
- 708 Ben-Ari, Y., Cherubini, E., Corradetti, R., and Gaiarsa, J.L. (1989). Giant synaptic potentials  
709 in immature rat CA3 hippocampal neurones. *J Physiol* 416, 303-325.
- 710 Benchenane, K., Peyrache, A., Khamassi, M., Tierney, P.L., Gioanni, Y., Battaglia, F.P., et  
711 al. (2010). Coherent theta oscillations and reorganization of spike timing in the  
712 hippocampal- prefrontal network upon learning. *Neuron* 66(6), 921-936. doi:  
713 10.1016/j.neuron.2010.05.013.
- 714 Berndt, A., Schoenenberger, P., Mattis, J., Tye, K.M., Deisseroth, K., Hegemann, P., et al.  
715 (2011). High-efficiency channelrhodopsins for fast neuronal stimulation at low light  
716 levels. *Proc Natl Acad Sci U S A* 108(18), 7595-7600. doi:  
717 10.1073/pnas.1017210108.
- 718 Bitzenhofer, S.H., Ahlbeck, J., and Hanganu-Opatz, I.L. (2017a). Methodological Approach  
719 for Optogenetic Manipulation of Neonatal Neuronal Networks. *Frontiers in Cellular*  
720 *Neuroscience* 11, 239-252. doi: 10.3389/fncel.2017.00239.
- 721 Bitzenhofer, S.H., Ahlbeck, J., Wolff, A., Wiegert, J.S., Gee, C.E., Oertner, T.G., et al.  
722 (2017b). Layer-specific optogenetic activation of pyramidal neurons causes beta-  
723 gamma entrainment of neonatal networks. *Nat Commun* 8, 14563. doi:  
724 10.1038/ncomms14563.
- 725 Bitzenhofer, S.H., and Hanganu-Opatz, I.L. (2014). Oscillatory coupling within neonatal  
726 prefrontal-hippocampal networks is independent of selective removal of GABAergic  
727 neurons in the hippocampus. *Neuropharmacology* 77, 57-67. doi:  
728 10.1016/j.neuropharm.2013.09.007.
- 729 Bitzenhofer, S.H., Sieben, K., Siebert, K.D., Spehr, M., and Hanganu-Opatz, I.L. (2015).  
730 Oscillatory activity in developing prefrontal networks results from theta-gamma-  
731 modulated synaptic inputs. *Cell Rep* 11(3), 486-497. doi:  
732 10.1016/j.celrep.2015.03.031.
- 733 Borrell, V., Yoshimura, Y., and Callaway, E.M. (2005). Targeted gene delivery to  
734 telencephalic inhibitory neurons by directional in utero electroporation. *J Neurosci*  
735 *Methods* 143(2), 151-158. doi: 10.1016/j.jneumeth.2004.09.027.

- 736 Brincat, S.L., and Miller, E.K. (2015). Frequency-specific hippocampal-prefrontal interactions  
737 during associative learning. *Nat Neurosci* 18(4), 576-581. doi: 10.1038/nn.3954.
- 738 Brockmann, M.D., Poschel, B., Cichon, N., and Hanganu-Opatz, I.L. (2011). Coupled  
739 oscillations mediate directed interactions between prefrontal cortex and hippocampus  
740 of the neonatal rat. *Neuron* 71(2), 332-347. doi: 10.1016/j.neuron.2011.05.041.
- 741 Buhl, D.L., and Buzsaki, G. (2005). Developmental emergence of hippocampal fast-field  
742 "ripple" oscillations in the behaving rat pups. *Neuroscience* 134(4), 1423-1430. doi:  
743 10.1016/j.neuroscience.2005.05.030.
- 744 Buzsaki, G. (2015). Hippocampal sharp wave-ripple: A cognitive biomarker for episodic  
745 memory and planning. *Hippocampus* 25(10), 1073-1188. doi: 10.1002/hipo.22488.
- 746 Cichon, N.B., Denker, M., Grun, S., and Hanganu-Opatz, I.L. (2014). Unsupervised  
747 classification of neocortical activity patterns in neonatal and pre-juvenile rodents.  
748 *Front Neural Circuits* 8, 50. doi: 10.3389/fncir.2014.00050.
- 749 Cirelli, C., and Tononi, G. (2015). Cortical development, electroencephalogram rhythms, and  
750 the sleep/wake cycle. *Biol Psychiatry* 77(12), 1071-1078. doi:  
751 10.1016/j.biopsych.2014.12.017.
- 752 Colgin, L.L. (2011). Oscillations and hippocampal-prefrontal synchrony. *Curr Opin Neurobiol*  
753 21(3), 467-474. doi: 10.1016/j.conb.2011.04.006.
- 754 Colgin, L.L. (2016). Rhythms of the hippocampal network. *Nat Rev Neurosci* 17(4), 239-249.  
755 doi: 10.1038/nrn.2016.21.
- 756 Dong, H.W., Swanson, L.W., Chen, L., Fanselow, M.S., and Toga, A.W. (2009). Genomic-  
757 anatomic evidence for distinct functional domains in hippocampal field CA1. *Proc Natl*  
758 *Acad Sci U S A* 106(28), 11794-11799. doi: 10.1073/pnas.0812608106.
- 759 Dupont, E., Hanganu, I.L., Kilb, W., Hirsch, S., and Luhmann, H.J. (2006). Rapid  
760 developmental switch in the mechanisms driving early cortical columnar networks.  
761 *Nature* 439(7072), 79-83. doi: 10.1038/nature04264.
- 762 Eichenbaum, H. (2017). Prefrontal-hippocampal interactions in episodic memory. *Nat Rev*  
763 *Neurosci* 18(9), 547-558. doi: 10.1038/nrn.2017.74.
- 764 Fanselow, M.S., and Dong, H.W. (2010). Are the dorsal and ventral hippocampus  
765 functionally distinct structures? *Neuron* 65(1), 7-19. doi:  
766 10.1016/j.neuron.2009.11.031.
- 767 Geisler, C., Robbe, D., Zugaro, M., Sirota, A., and Buzsaki, G. (2007). Hippocampal place  
768 cell assemblies are speed-controlled oscillators. *Proc Natl Acad Sci U S A* 104(19),  
769 8149-8154. doi: 10.1073/pnas.0610121104.
- 770 Granger, C.W.J. (1980). Testing for causality. *Journal of Economic Dynamics and Control* 2,  
771 329-352. doi: 10.1016/0165-1889(80)90069-x.
- 772 Hallock, H.L., Wang, A., and Griffin, A.L. (2016). Ventral Midline Thalamus Is Critical for  
773 Hippocampal-Prefrontal Synchrony and Spatial Working Memory. *J Neurosci* 36(32),  
774 8372-8389. doi: 10.1523/JNEUROSCI.0991-16.2016.
- 775 Hanganu-Opatz, I.L. (2010). Between molecules and experience: role of early patterns of  
776 coordinated activity for the development of cortical maps and sensory abilities. *Brain*  
777 *Res Rev* 64(1), 160-176. doi: 10.1016/j.brainresrev.2010.03.005.
- 778 Hanganu, I.L., Ben-Ari, Y., and Khazipov, R. (2006). Retinal waves trigger spindle bursts in  
779 the neonatal rat visual cortex. *J Neurosci* 26(25), 6728-6736. doi:  
780 10.1523/JNEUROSCI.0752-06.2006.
- 781 Hartung, H., Brockmann, M.D., Poschel, B., De Feo, V., and Hanganu-Opatz, I.L. (2016).  
782 Thalamic and Entorhinal Network Activity Differently Modulates the Functional  
783 Development of Prefrontal-Hippocampal Interactions. *Journal of Neuroscience*  
784 36(13), 3676-3690. doi: 10.1523/jneurosci.3232-15.2016.
- 785 Hoerder-Suabedissen, A., and Molnar, Z. (2015). Development, evolution and pathology of  
786 neocortical subplate neurons. *Nat Rev Neurosci* 16(3), 133-146. doi:  
787 10.1038/nrn3915.
- 788 Honeycutt, J.A., Keary Iii, K.M., Kania, V.M., and Chrobak, J.J. (2016). Developmental Age  
789 Differentially Mediates the Calcium-Binding Protein Parvalbumin in the Rat: Evidence  
790 for a Selective Decrease in Hippocampal Parvalbumin Cell Counts. *Dev Neurosci*  
791 38(2), 105-114. doi: 10.1159/000444447.

- 792 Hubel, D.H., Wiesel, T.N., and LeVay, S. (1977). Plasticity of Ocular Dominance Columns in  
793 Monkey Striate Cortex. *Philosophical Transactions of the Royal Society B: Biological*  
794 *Sciences* 278(961), 377-409. doi: 10.1098/rstb.1977.0050.
- 795 Huberman, A.D., Speer, C.M., and Chapman, B. (2006). Spontaneous retinal activity  
796 mediates development of ocular dominance columns and binocular receptive fields in  
797 v1. *Neuron* 52(2), 247-254. doi: 10.1016/j.neuron.2006.07.028.
- 798 Jay, T.M., and Witter, M.P. (1991). Distribution of hippocampal CA1 and subicular efferents  
799 in the prefrontal cortex of the rat studied by means of anterograde transport of  
800 Phaseolus vulgaris-leucoagglutinin. *J Comp Neurol* 313(4), 574-586. doi:  
801 10.1002/cne.903130404.
- 802 Khazipov, R., Minlebaev, M., and Valeeva, G. (2013). Early gamma oscillations.  
803 *Neuroscience* 250, 240-252. doi: 10.1016/j.neuroscience.2013.07.019.
- 804 Kruger, H.S., Brockmann, M.D., Salamon, J., Ittrich, H., and Hanganu-Opatz, I.L. (2012).  
805 Neonatal hippocampal lesion alters the functional maturation of the prefrontal cortex  
806 and the early cognitive development in pre-juvenile rats. *Neurobiol Learn Mem* 97(4),  
807 470-481. doi: 10.1016/j.nlm.2012.04.001.
- 808 Lindemann, C., Ahlbeck, J., Bitzenhofer, S.H., and Hanganu-Opatz, I.L. (2016). Spindle  
809 Activity Orchestrates Plasticity during Development and Sleep. *Neural Plast* 2016,  
810 5787423. doi: 10.1155/2016/5787423.
- 811 Luhmann, H.J., and Khazipov, R. (2017). Neuronal activity patterns in the developing barrel  
812 cortex. *Neuroscience*. doi: 10.1016/j.neuroscience.2017.05.025.
- 813 Minlebaev, M., Ben-Ari, Y., and Khazipov, R. (2009). NMDA receptors pattern early activity in  
814 the developing barrel cortex in vivo. *Cereb Cortex* 19(3), 688-696. doi:  
815 10.1093/cercor/bhn115.
- 816 Minlebaev, M., Colonnese, M., Tsintsadze, T., Sirota, A., and Khazipov, R. (2011). Early  
817 gamma oscillations synchronize developing thalamus and cortex. *Science* 334(6053),  
818 226-229. doi: 10.1126/science.1210574.
- 819 Moser, E.I. (1998). Impaired Spatial Learning after Saturation of Long-Term Potentiation.  
820 *Science* 281(5385), 2038-2042. doi: 10.1126/science.281.5385.2038.
- 821 Moser, M.B., Moser, E.I., Forrest, E., Andersen, P., and Morris, R.G. (1995). Spatial learning  
822 with a minislab in the dorsal hippocampus. *Proc Natl Acad Sci USA* 92(21), 9697-  
823 9701.
- 824 Niwa, M., Kamiya, A., Murai, R., Kubo, K., Gruber, A.J., Tomita, K., et al. (2010). Knockdown  
825 of DISC1 by in utero gene transfer disturbs postnatal dopaminergic maturation in the  
826 frontal cortex and leads to adult behavioral deficits. *Neuron* 65(4), 480-489. doi:  
827 10.1016/j.neuron.2010.01.019.
- 828 Nolte, G., Bai, O., Wheaton, L., Mari, Z., Vorbach, S., and Hallett, M. (2004). Identifying true  
829 brain interaction from EEG data using the imaginary part of coherency. *Clin*  
830 *Neurophysiol* 115(10), 2292-2307. doi: 10.1016/j.clinph.2004.04.029.
- 831 O'Keefe, J., and Nadel, L. (1978). *The Hippocampus as a Cognitive Map*. New York: Oxford  
832 University Press.
- 833 O'Keefe, J., and Recce, M.L. (1993). Phase relationship between hippocampal place units  
834 and the EEG theta rhythm. *Hippocampus* 3(3), 317-330. doi:  
835 10.1002/hipo.450030307.
- 836 Patel, J., Schomburg, E.W., Berenyi, A., Fujisawa, S., and Buzsaki, G. (2013). Local  
837 generation and propagation of ripples along the septotemporal axis of the  
838 hippocampus. *J Neurosci* 33(43), 17029-17041. doi: 10.1523/JNEUROSCI.2036-  
839 13.2013.
- 840 Pitkanen, A., Pikkarainen, M., Nurminen, N., and Ylinen, A. (2000). Reciprocal connections  
841 between the amygdala and the hippocampal formation, perirhinal cortex, and  
842 postrhinal cortex in rat - A review. *Parahippocampal Region* 911(1), 369-391. doi:  
843 10.1111/j.1749-6632.2000.tb06738.x.
- 844 Place, R., Farovik, A., Brockmann, M., and Eichenbaum, H. (2016). Bidirectional prefrontal-  
845 hippocampal interactions support context-guided memory. *Nat Neurosci* 19(8), 992-  
846 994. doi: 10.1038/nn.4327.

- 847 Rodrigues, P.L., and Baccala, L.A. (2016). Statistically significant time-varying neural  
848 connectivity estimation using generalized partial directed coherence. *Conf Proc IEEE*  
849 *Eng Med Biol Soc* 2016, 5493-5496. doi: 10.1109/EMBC.2016.7591970.
- 850 Royer, S., Sirota, A., Patel, J., and Buzsaki, G. (2010). Distinct representations and theta  
851 dynamics in dorsal and ventral hippocampus. *J Neurosci* 30(5), 1777-1787. doi:  
852 10.1523/JNEUROSCI.4681-09.2010.
- 853 Seelke, A.M., and Blumberg, M.S. (2010). Developmental appearance and disappearance of  
854 cortical events and oscillations in infant rats. *Brain Res* 1324, 34-42. doi:  
855 10.1016/j.brainres.2010.01.088.
- 856 Shen, J., and Colonnese, M.T. (2016). Development of Activity in the Mouse Visual Cortex. *J*  
857 *Neurosci* 36(48), 12259-12275. doi: 10.1523/JNEUROSCI.1903-16.2016.
- 858 Siapas, A.G., Lubenov, E.V., and Wilson, M.A. (2005). Prefrontal phase locking to  
859 hippocampal theta oscillations. *Neuron* 46(1), 141-151. doi:  
860 10.1016/j.neuron.2005.02.028.
- 861 Siapas, A.G., and Wilson, M.A. (1998). Coordinated interactions between hippocampal  
862 ripples and cortical spindles during slow-wave sleep. *Neuron* 21(5), 1123-1128. doi:  
863 Doi 10.1016/S0896-6273(00)80629-7.
- 864 Sigurdsson, T., Stark, K.L., Karayiorgou, M., Gogos, J.A., and Gordon, J.A. (2010). Impaired  
865 hippocampal-prefrontal synchrony in a genetic mouse model of schizophrenia. *Nature*  
866 464(7289), 763-767. doi: 10.1038/nature08855.
- 867 Sirota, A., Montgomery, S., Fujisawa, S., Isomura, Y., Zugaro, M., and Buzsaki, G. (2008).  
868 Entrainment of neocortical neurons and gamma oscillations by the hippocampal theta  
869 rhythm. *Neuron* 60(4), 683-697. doi: 10.1016/j.neuron.2008.09.014.
- 870 Spellman, T., Rigotti, M., Ahmari, S.E., Fusi, S., Gogos, J.A., and Gordon, J.A. (2015).  
871 Hippocampal-prefrontal input supports spatial encoding in working memory. *Nature*  
872 522(7556), 309-314. doi: 10.1038/nature14445.
- 873 Stewart, M., and Fox, S.E. (1990). Do septal neurons pace the hippocampal theta rhythm?  
874 *Trends in Neurosciences* 13(5), 163-169. doi: 10.1016/0166-2236(90)90040-h.
- 875 Strange, B.A., Witter, M.P., Lein, E.S., and Moser, E.I. (2014). Functional organization of the  
876 hippocampal longitudinal axis. *Nat Rev Neurosci* 15(10), 655-669. doi:  
877 10.1038/nrn3785.
- 878 Stujenske, J.M., Spellman, T., and Gordon, J.A. (2015). Modeling the Spatiotemporal  
879 Dynamics of Light and Heat Propagation for In Vivo Optogenetics. *Cell Rep* 12(3),  
880 525-534. doi: 10.1016/j.celrep.2015.06.036.
- 881 Swanson, L.W. (1981). A direct projection from Ammon's horn to prefrontal cortex in the rat.  
882 *Brain Res* 217(1), 150-154.
- 883 Szczurkowska, J., Cwetsch, A.W., dal Maschio, M., Ghezzi, D., Ratto, G.M., and Cancedda,  
884 L. (2016). Targeted in vivo genetic manipulation of the mouse or rat brain by in utero  
885 electroporation with a triple-electrode probe. *Nat Protoc* 11(3), 399-412. doi:  
886 10.1038/nprot.2016.014.
- 887 Tabata, H., and Nakajima, K. (2001). Efficient in utero gene transfer system to the  
888 developing mouse brain using electroporation: Visualization of neuronal migration in  
889 the developing cortex. *Neuroscience* 103(4), 865-872. doi: Doi 10.1016/S0306-  
890 4522(01)00016-1.
- 891 Taxidis, J., Coomber, B., Mason, R., and Owen, M. (2010). Assessing cortico-hippocampal  
892 functional connectivity under anesthesia and kainic acid using generalized partial  
893 directed coherence. *Biol Cybern* 102(4), 327-340. doi: 10.1007/s00422-010-0370-1.
- 894 Thompson, C.L., Pathak, S.D., Jeromin, A., Ng, L.L., MacPherson, C.R., Mortrud, M.T., et al.  
895 (2008). Genomic anatomy of the hippocampus. *Neuron* 60(6), 1010-1021. doi:  
896 10.1016/j.neuron.2008.12.008.
- 897 Tolner, E.A., Sheikh, A., Yukin, A.Y., Kaila, K., and Kanold, P.O. (2012). Subplate neurons  
898 promote spindle bursts and thalamocortical patterning in the neonatal rat  
899 somatosensory cortex. *J Neurosci* 32(2), 692-702. doi: 10.1523/JNEUROSCI.1538-  
900 11.2012.

- 901 Vertes, R.P., Hoover, W.B., Szigeti-Buck, K., and Leranath, C. (2007). Nucleus reuniens of the  
902 midline thalamus: link between the medial prefrontal cortex and the hippocampus.  
903 *Brain Res Bull* 71(6), 601-609. doi: 10.1016/j.brainresbull.2006.12.002.  
904 Wirt, R.A., and Hyman, J.M. (2017). Integrating Spatial Working Memory and Remote  
905 Memory: Interactions between the Medial Prefrontal Cortex and Hippocampus. *Brain*  
906 *Sci* 7(4), 43. doi: 10.3390/brainsci7040043.  
907 Witter, M.P., and Amaral, D.G. (2004). "Hippocampal Formation," in *The Rat Nervous*  
908 *System*. Elsevier Inc.), 635-704.  
909 Witter, M.P., Van Hoesen, G.W., and Amaral, D.G. (1989). Topographical organization of the  
910 entorhinal projection to the dentate gyrus of the monkey. *J Neurosci* 9(1), 216-228.  
911 Xu, H.P., Furman, M., Mineur, Y.S., Chen, H., King, S.L., Zenisek, D., et al. (2011). An  
912 instructive role for patterned spontaneous retinal activity in mouse visual map  
913 development. *Neuron* 70(6), 1115-1127. doi: 10.1016/j.neuron.2011.04.028.  
914 Xu, W., and Sudhof, T.C. (2013). A neural circuit for memory specificity and generalization.  
915 *Science* 339(6125), 1290-1295. doi: 10.1126/science.1229534.  
916 Yasuda, M., Johnson-Venkatesh, E.M., Zhang, H., Parent, J.M., Sutton, M.A., and Umemori,  
917 H. (2011). Multiple forms of activity-dependent competition refine hippocampal circuits  
918 in vivo. *Neuron* 70(6), 1128-1142. doi: 10.1016/j.neuron.2011.04.027.  
919 Ye, X., Kapeller-Libermann, D., Travaglia, A., Inda, M.C., and Alberini, C.M. (2017). Direct  
920 dorsal hippocampal-prelimbic cortex connections strengthen fear memories. *Nat*  
921 *Neurosci* 20(1), 52-61. doi: 10.1038/nn.4443.  
922 Yuste, R., Nelson, D.A., Rubin, W.W., and Katz, L.C. (1995). Neuronal domains in  
923 developing neocortex: mechanisms of coactivation. *Neuron* 14(1), 7-17.  
924 Zhang, L., Spigelman, I., and Carlen, P.L. (1990). Whole-cell patch study of GABAergic  
925 inhibition in CA1 neurons of immature rat hippocampal slices. *Developmental Brain*  
926 *Research* 56(1), 127-130. doi: 10.1016/0165-3806(90)90171-t.

927

928

929 **Figure legends**

930 **Figure 1.** Patterns of discontinuous oscillatory activity in the CA1 area of the neonatal dHP  
931 and i/vHP *in vivo*. **(A)** Characteristic theta burst activity recorded in the CA1 area of the dHP  
932 (left) and i/vHP (right) of a P9 mouse displayed after band-pass filtering (4-100 Hz) and the  
933 corresponding MUA (500-5000 Hz). Color-coded frequency plots show the wavelet spectrum  
934 of LFP at identical time scale. **(B)** Bar diagram (mean  $\pm$  SEM) displaying the occurrence of  
935 discontinuous theta bursts in dHP (n=41 mice) and i/vHP (n=103 mice). **(C)** Power analysis  
936 of discontinuous oscillatory activity  $P(f)$  normalized to the non-oscillatory period  $P_0(f)$  in dHP  
937 and i/vHP. (i) Power spectra (4-100 Hz) averaged for all investigated mice. (ii) Bar diagrams  
938 quantifying the mean power within theta frequency band (4-12 Hz) in dHP (n=41 mice) and  
939 i/vHP (n=103 mice) **(D)** Bar diagram displaying the SUA of dHP (n=158 units) and i/vHP  
940 (n=557 units) after clustering of spike shapes. **(E)** Characteristic SPWs and ripple events  
941 recorded in dHP (left) and i/vHP (right). **(F)** Bar diagrams (mean  $\pm$  SEM) displaying the SPWs  
942 occurrence in dHP and i/vHP. **(G)** Characteristic SPW-ripple events recorded in dHP (left)  
943 and i/vHP (right). **(H)** Bar diagram displaying the mean power of ripples in dHP and i/vHP. **(I)**  
944 Spike trains from neurons in dHP (left) and i/vHP (right) aligned to SPWs. **(J)** Histograms of  
945 SUA aligned to SPWs (n=232 units for dHP, n=670 for i/vHP). Data are represented as mean  
946  $\pm$  SEM. \*p < 0.05, \*\*p < 0.01, \*\*\*p < 0.001.

947

948 **Figure 2.** Dynamic coupling of hippocampal and prefrontal oscillatory activity along septo-  
949 temporal axis during neonatal development. **(A)** Simultaneous LFP recordings of  
950 discontinuous oscillatory activity in dHP and PL (top) and i/vHP and PL (bottom). **(B)** Long-  
951 range synchrony within prefrontal-hippocampal networks. (i) Average coherence spectra for  
952 simultaneously recorded oscillatory events in dHP and PL as well as i/vHP and PL. (ii) Bar  
953 diagrams (mean  $\pm$  SEM) displaying the coherence in theta (4-12 Hz), beta (12-30 Hz), and  
954 gamma (30-100 Hz) band when averaged for all investigated mice. **(C)** Directed interactions  
955 between PL and either dHP or i/vHP monitored by general Partial Directed Coherence  
956 (gPDC). Bar diagrams displaying the gPDC calculated for theta (4-12 Hz, left) and beta (12-

957 30 Hz, right) frequency and averaged for all investigated animals (n=41 mice for dHP and PL,  
958 n=103 mice for i/vHP & PL). **(D)** Histograms displaying the phase-locking of prelimbic spikes  
959 to theta oscillations in dHP (left) and i/vHP (right). Note the different proportion of spikes  
960 significantly locked along the septo-temporal axis (dHP, 3 of 46 units; i/vHP, 52 of 310 units).  
961 Data are represented as mean  $\pm$  SEM. \*p < 0.05, \*\*\*p < 0.001.

962

963 **Figure 3.** Coupling between neonatal PFC and HP during hippocampal SPWs. **(A)** Power  
964 changes in the PL during hippocampal SPWs. (i) Color-coded frequency plot showing the  
965 relative power in the PL aligned to the onset of SPWs detected in i/vHP when normalized to  
966 the power change caused in the PL by SPWs in the dHP. All other colors than green  
967 represent power augmentation (red) or decrease (blue). (ii) Bar diagrams displaying mean  
968 power changes of prelimbic activity in different frequency bands (left, theta; middle, beta;  
969 right, gamma) before (pre) and after (post) hippocampal SPWs in the dHP and i/vHP (n=41  
970 mice for dHP, n=103 mice for i/vHP). **(B)** Spike trains recorded in the PL before and after  
971 SPWs occurring either in the dHP (left) or i/vHP (right). **(C)** Histograms of prelimbic spiking in  
972 relationship with hippocampal SPWs (n=148 units for dHP, n=560 units for i/vHP). Data are  
973 represented as mean  $\pm$  SEM. \*p < 0.05, \*\*p < 0.01, \*\*\*p < 0.001.

974

975 **Figure 4.** Long-range monosynaptic axonal projections connecting the neonatal PFC and  
976 hippocampal CA1 area along the septo-temporal axis. **(A)** Photomicrographs depicting dense  
977 retrogradely labelled neurons in the CA1 area of i/vHP (right) but not dHP (middle) after FG  
978 injection into PL at P1 (left). Bar diagram displays the overall density of retrogradely stained  
979 neurons when averaged for all investigated pups (n=8 mice). **(B)** Photomicrographs depicting  
980 anterogradely labeled axons targeting the PL of a P10 mouse (right) after iontophoretic BDA  
981 injection into the CA1 area of i/vHP at P7 (left). The site of injection and the area with the  
982 highest axonal density are depicted at higher magnification. Data are represented as mean  $\pm$   
983 SEM. \*\*\*p < 0.001.

984



985

986 **Figure 5.** Optogenetic activation of pyramidal neurons in the CA1 area of dHP and i/vHP has  
987 different effects on the network activity of neonatal PL. **(A)** Cell- and layer-specific  
988 transfection of dHP or i/vHP with CAG-ChR2(ET/TC)-2A-tDimer2 by site-directed IUE. (i)  
989 Photomicrographs depicting tDimer2-expressing pyramidal neurons (red) in the CA1 region  
990 of dHP (left) and i/vHP (right) when stained for NeuN (green, top panels) or GABA (green,  
991 bottom panels). (ii) Photomicrographs depicting the transfected hippocampal neurons when  
992 co-stained for NeuN and displayed at larger magnification. (iii) Photomicrographs depicting  
993 transfected hippocampal neurons when co-stained for GABA and displayed at larger  
994 magnification. **(B)** Optogenetic activation of pyramidal neurons in CA1 area along septo-  
995 temporal axis. (i) Representative raster plot and corresponding spike probability histogram  
996 for dHP (left) and i/vHP (right) in response to 30 sweeps of 8 Hz pulse stimulation (3 ms  
997 pulse length, 473 nm). (ii) Bar diagram displaying the efficacy of inducing spiking in dHP and  
998 i/vHP of different stimulation frequencies. **(C)** Characteristic light-induced discontinuous  
999 oscillatory activity in the PL of a P10 mouse after transfection of pyramidal neurons in the  
1000 CA1 area of the dHP (left) or i/vHP (right) with ChR2(ET/TC) by IUE. The LFP is displayed  
1001 after band-pass filtering (4-100 Hz) together with the corresponding color-coded wavelet  
1002 spectrum at identical time scale. **(D)** Power analysis of prelimbic oscillatory activity  $P_{stim}(f)$   
1003 after light stimulation of dHP (green) and i/v HP (orange) at different frequencies (4, 8, 16 Hz)  
1004 normalized to the activity before stimulus  $P_{pre}(f)$ . (i) Power spectra (0-100 Hz) averaged for all  
1005 investigated mice. (ii) Bar diagrams displaying mean power changes in PL during stimulation  
1006 of either dHP (top panels) or i/vHP (bottom panels). Data are represented as mean  $\pm$  SEM.  
1007 \* $p < 0.05$ , \*\* $p < 0.01$ .

1008

### 1009 **Table legends**

#### 1010 **Table 1.**

1011 Mean power changes in PL after light stimulation of dHP or i/vHP in ChR2(ET/TC)-containing  
1012 and opsin-free animals. \* $p < 0.05$ , \*\* $p < 0.01$ .

1013 **Supplementary figure legends**

1014 **Figure S1 (Figure Supplement 1 for Figure 1).** Properties of network and neuronal activity  
1015 in i/vHP of neonatal non-anesthetized and urethane-anesthetized mice. **(A)** Plots displaying  
1016 the mean power of oscillatory events for theta, beta and gamma frequencies before and after  
1017 urethane anesthesia (n=9 mice). **(B)** Same as (A) for mean coherence between oscillatory  
1018 events in i/vHP and PL. **(C)** Same as (A) for directed interactions between i/vHP and PL  
1019 measured by mean gPDC in theta and beta frequency bands. **(D)** Impact of urethane  
1020 anesthesia on the firing rate (i) and phase locking to theta, beta, and gamma oscillatory  
1021 network activity. Each line corresponds to one investigated pup. Error bars represent SEM.  
1022 \*p < 0.05, \*\*p < 0.01.

1023

1024 **Figure S2 (Figure supplement 2 for Figure 1).** Properties of network and neuronal activity  
1025 in dHP vs. i/vHP of neonatal mice. **(A)** Bar diagrams displaying the amplitude and duration of  
1026 discontinuous oscillatory events in dHP (n=41 mice) and i/vHP (n=103 mice). **(B)** Bar  
1027 diagrams displaying the power spectrum of discontinuous oscillatory activity P(f) normalized  
1028 to the non-oscillatory period P0(f) when averaged for beta (12-30 Hz) and gamma (30-100  
1029 Hz) frequency bands in dHP (left, n=41 mice) and i/vHP (right, n=103 mice). **(C)** Histograms  
1030 displaying the phase-locking of hippocampal spikes to ripple activity in dHP (left) and i/vHP  
1031 (right). Error bars represent SEM. \*\*p < 0.01, \*\*\*p < 0.001.

1032

1033 **Figure S3 (Figure supplement 1 for figure 5).** Experimental protocol for in utero  
1034 electroporation of the hippocampus. **(A)** Structure of the ChR2(ET/TC)-containing and opsin-  
1035 free constructs. **(B)** Schematic drawing illustrating the orientation of electrode paddles for  
1036 specific targeting of either (i) dHP or (ii) i/vHP pyramidal neurons. **(C)** Bar diagram displaying  
1037 the mean number of embryos, electroporated embryos, surviving pups, and positively  
1038 transfected pups when ChR2(ET/TC)-containing and opsin-free constructs for (i) dHP (n=8  
1039 litters for opsin-containing group, n=5 for opsin-free group) and (ii) i/vHP (n=8 litters for  
1040 opsin-containing group, n=3 litters for opsin-free group). **(D)** Line plots displaying the

1041 developmental profile of somatic growth [body length, tail length, weight] and reflexes  
1042 [vibrissa placing, cliff aversion and surface righting reflexes] of P2-8 pups expressing  
1043 ChR2(ET/TC) or opsin-free constructs in (i) dHP (n=17 for opsin-containing pups, n=14 for  
1044 opsin-free pups) and (ii) i/vHP (n=9 for opsin-containing pups, n=5 for opsin-free pups). Error  
1045 bars represent SEM.

1046

1047 **Figure S4 (Figure supplement 2 for figure 5).** Response in prelimbic cortex for opsin-free  
1048 animals. Bar diagrams displaying the power changes in PL during light stimulation of  
1049 pyramidal neurons in the CA1 area of dHP (top panels) or i/vHP (bottom panels) when  
1050 normalized to the values before hippocampal stimulation for opsin-free animals. Error bars  
1051 represent SEM.

1052

1053 **Supplementary table legends**

1054 **Table S1 (table supplement 1 for figures 1-5 & supplementary figures 1-4)** Summary of  
1055 statistics for all experiments. (A) Statistical testing, number of investigated mice and p-values  
1056 for the analyses displayed in figure 1. (B)–(H) Same as (A) for analyses in figures 2–5, S1-4.

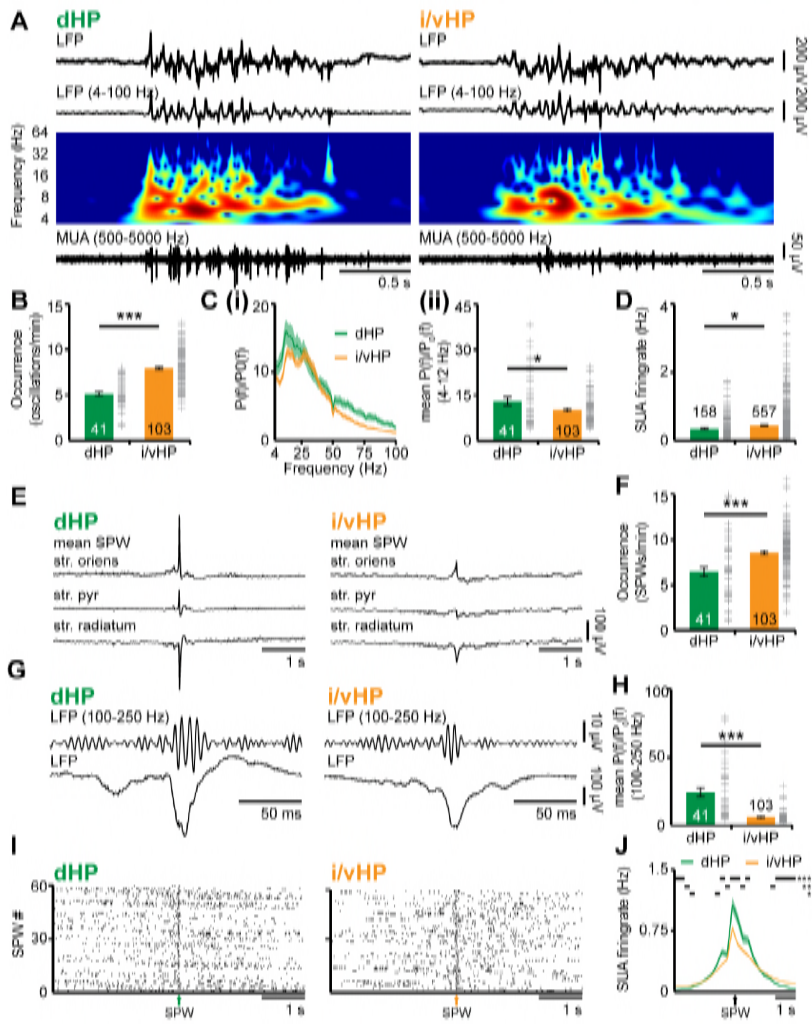

Ahlbeck et al., Figure 1

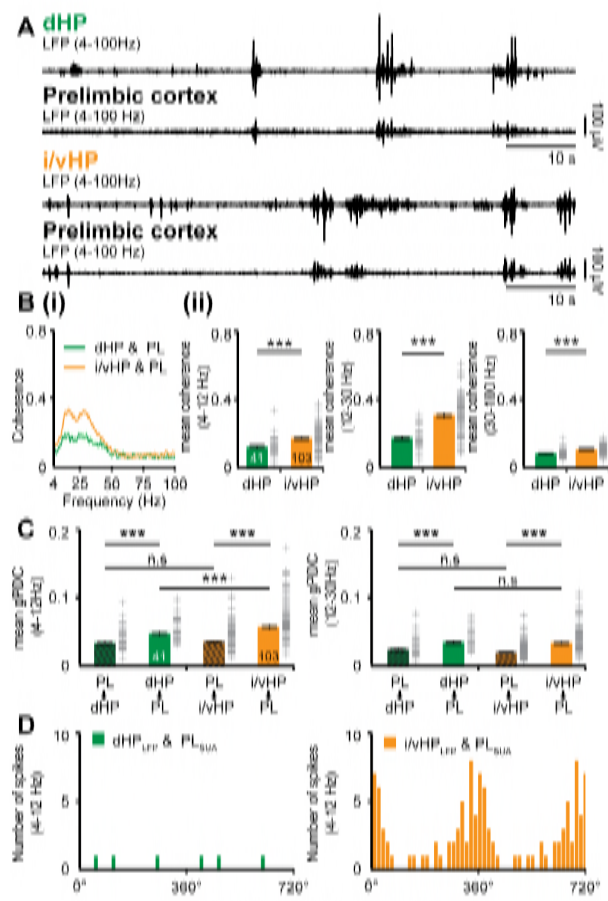

Ahlbeck et al., Figure 2

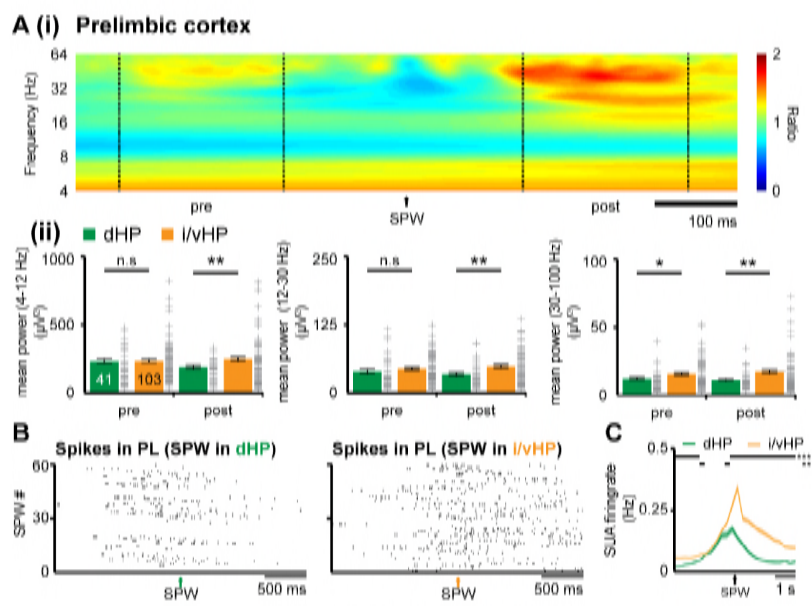

Ahlbeck et al., Figure 3

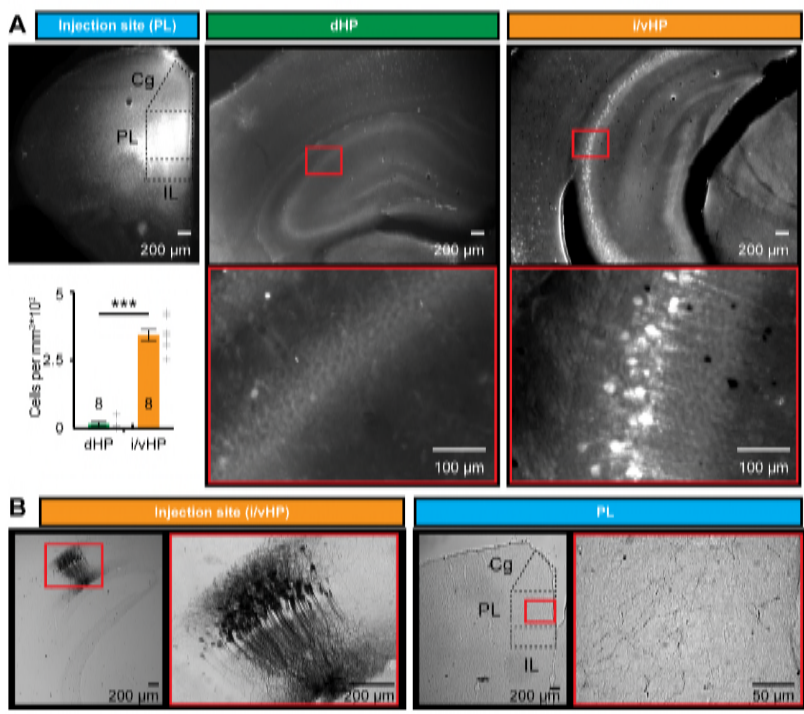

Ahlbeck et al., Figure 4

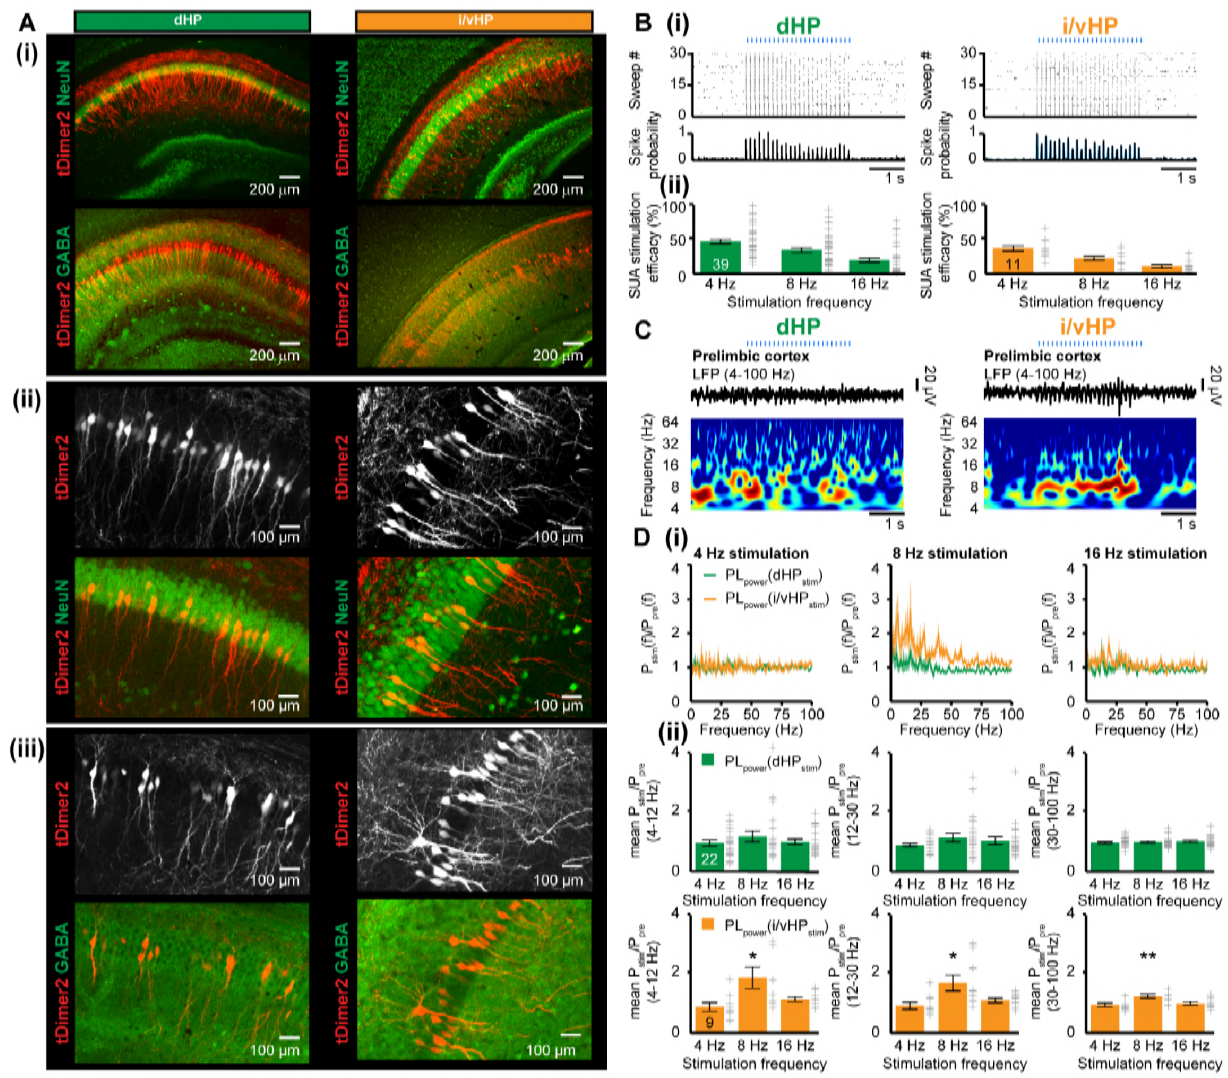

Ahlbeck et al., Figure 5



| ChR2(ET/TC)      | dHP                   |           |           | i/vHP                 |                |           |
|------------------|-----------------------|-----------|-----------|-----------------------|----------------|-----------|
|                  | Stimulation Frequency |           |           | Stimulation Frequency |                |           |
|                  | 4 Hz                  | 8 Hz      | 16 Hz     | 4 Hz                  | 8 Hz           | 16hz      |
| <b>Theta</b>     | 0.97±0.10             | 1.19±0.19 | 1.0±0.093 | 0.90±0.15             | 1.89±0.36 (*)  | 1.16±0.08 |
| <b>Beta</b>      | 0.91±0.06             | 1.17±0.15 | 1.06±0.13 | 0.94±0.12             | 1.72±0.27 (*)  | 1.12±0.08 |
| <b>Gamma</b>     | 1.0±0.035             | 1.00±0.19 | 1.04±0.38 | 0.97±0.06             | 1.26±0.06 (**) | 1.02±0.06 |
| <b>Opsinfree</b> |                       |           |           |                       |                |           |
| <b>Theta</b>     | 1.11±0.14             | 1.09±0.19 | 1.14±0.22 | 1.17±0.27             | 1.17±0.20      | 1.16±0.12 |
| <b>Beta</b>      | 1.13±0.15             | 0.99±0.16 | 1.11±0.11 | 1.05±0.22             | 0.95±0.18      | 1.08±0.13 |
| <b>Gamma</b>     | 1.08±0.06             | 0.93±0.04 | 1.03±0.03 | 0.89±0.09             | 0.94±0.07      | 0.97±0.04 |

Table 1

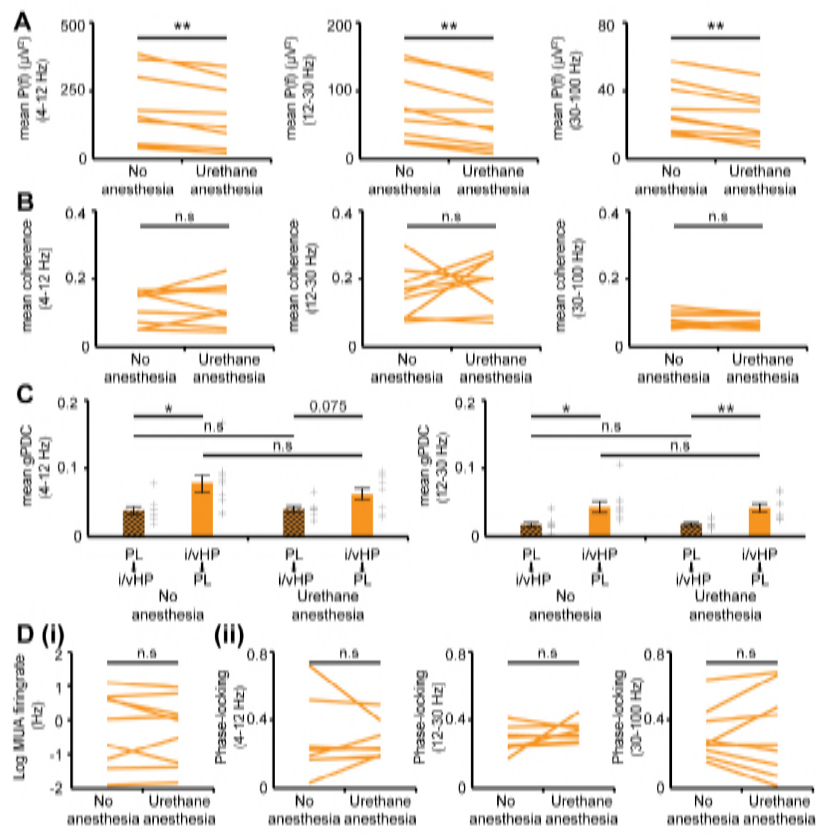

Ahlbeck et al., Figure S1

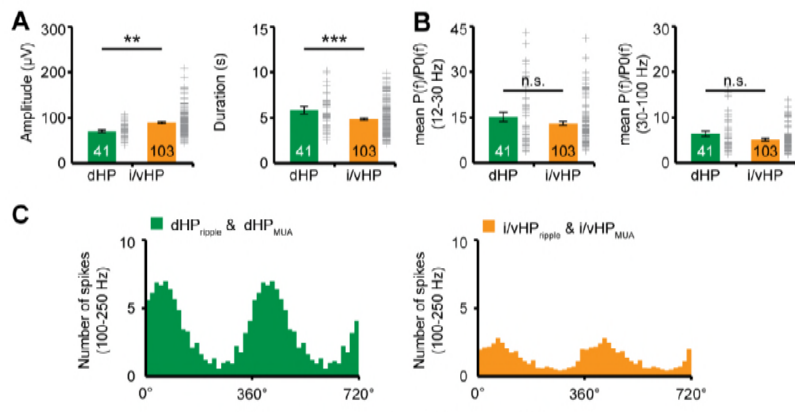

Ahlbeck et al., Figure S2

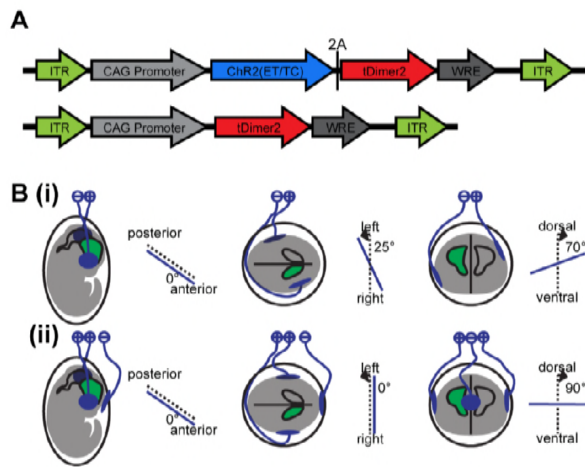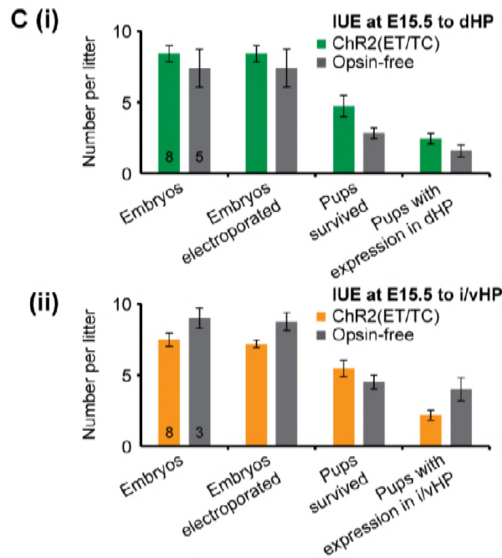

**D (i) IUE at E15.5 to dHP**

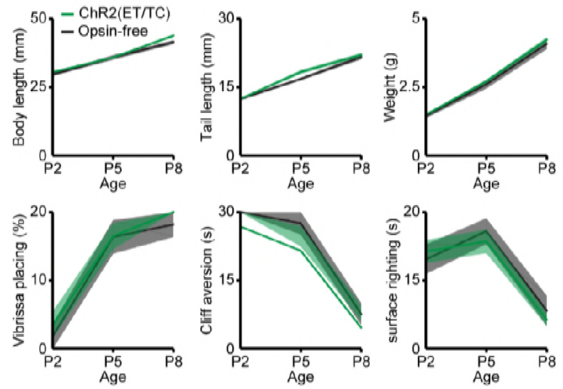

**D (ii) IUE at E15.5 to i/vHP**

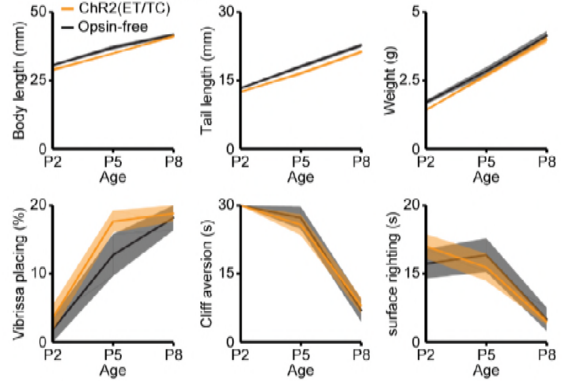

Ahlbeck et al., Figure S3

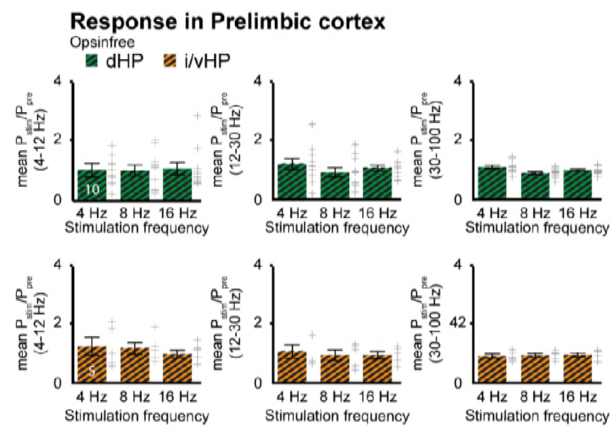

Ahlbeck et al., Figure S4

Supplementary table 1

A

| Figure       | Panel                                     | Title                           | Description                                                       | Detail                                    | Test                                      | n                               | p      |
|--------------|-------------------------------------------|---------------------------------|-------------------------------------------------------------------|-------------------------------------------|-------------------------------------------|---------------------------------|--------|
| 1            | B                                         | Occurrence                      | Occurrence of theta burst oscillations in hippocampus             |                                           | t-test                                    | dHP: 41 mice; i/vHP: 103 mice   | <0.001 |
|              | C(ii)                                     | Power                           | Theta power in hippocampus                                        |                                           | t-test                                    | dHP: 41 mice; i/vHP: 103 mice   | 0.026  |
|              | D                                         | SUA firingrate                  | SUA firingrate in hippocampus                                     |                                           | t-test                                    | dHP: 158 units; i/vHP 557 units | 0.025  |
|              | F                                         | Occurrence                      | Occurrence of sharpwave-ripple complex in hippocampus             |                                           | t-test                                    | dHP: 41 mice; i/vHP: 103 mice   | <0.001 |
|              | H                                         | Power                           | Ripple power in hippocampus                                       |                                           | t-test                                    | dHP: 41 mice; i/vHP: 103 mice   | <0.001 |
|              | J                                         | SUA firingrate                  | SUA firingrate in hippocampus aligned to sharpwave-ripple complex | 0-250 ms                                  | One-way ANOVA – Bonferroni-Holm corrected | dHP: 232 units; i/vHP 670 units | <0.001 |
|              |                                           |                                 |                                                                   | 250-500 ms                                | One-way ANOVA – Bonferroni-Holm corrected | dHP: 232 units; i/vHP 670 units | <0.001 |
|              |                                           |                                 |                                                                   | 500-750 ms                                | One-way ANOVA – Bonferroni-Holm corrected | dHP: 232 units; i/vHP 670 units | 0.0022 |
|              |                                           |                                 |                                                                   | 750-1000 ms                               | One-way ANOVA – Bonferroni-Holm corrected | dHP: 232 units; i/vHP 670 units | 0.17   |
|              |                                           |                                 |                                                                   | 1000-1250 ms                              | One-way ANOVA – Bonferroni-Holm corrected | dHP: 232 units; i/vHP 670 units | 0.28   |
|              |                                           |                                 |                                                                   | 1250-1500 ms                              | One-way ANOVA – Bonferroni-Holm corrected | dHP: 232 units; i/vHP 670 units | 0.72   |
|              |                                           |                                 |                                                                   | 1500-1750 ms                              | One-way ANOVA – Bonferroni-Holm corrected | dHP: 232 units; i/vHP 670 units | 0.29   |
|              |                                           |                                 |                                                                   | 1750-2000 ms                              | One-way ANOVA – Bonferroni-Holm corrected | dHP: 232 units; i/vHP 670 units | 0.42   |
|              |                                           |                                 |                                                                   | 2000-2250 ms                              | One-way ANOVA – Bonferroni-Holm corrected | dHP: 232 units; i/vHP 670 units | 0.01   |
| 2250-2500 ms |                                           |                                 |                                                                   | One-way ANOVA – Bonferroni-Holm corrected | dHP: 232 units; i/vHP 670 units           | <0.001                          |        |
| 2500-2750 ms |                                           |                                 |                                                                   | One-way ANOVA – Bonferroni-Holm corrected | dHP: 232 units; i/vHP 670 units           | 0.093                           |        |
| 2750-3000 ms |                                           |                                 |                                                                   | One-way ANOVA – Bonferroni-Holm corrected | dHP: 232 units; i/vHP 670 units           | <0.001                          |        |
| 3000-3250 ms |                                           |                                 |                                                                   | One-way ANOVA – Bonferroni-Holm corrected | dHP: 232 units; i/vHP 670 units           | <0.001                          |        |
| 3250-3500 ms | One-way ANOVA – Bonferroni-Holm corrected | dHP: 232 units; i/vHP 670 units | 0.0063                                                            |                                           |                                           |                                 |        |
| 3500-3750 ms | One-way ANOVA – Bonferroni-Holm corrected | dHP: 232 units; i/vHP 670 units | <0.001                                                            |                                           |                                           |                                 |        |

|  |  |  |  |              |                                           |                                  |        |
|--|--|--|--|--------------|-------------------------------------------|----------------------------------|--------|
|  |  |  |  | 3750-4000 ms | One-way ANOVA – Bonferroni-Holm corrected | dHP: 232 units; i/vHP: 670 units | 0.083  |
|  |  |  |  | 4000-4250 ms | One-way ANOVA – Bonferroni-Holm corrected | dHP: 232 units; i/vHP: 670 units | 0.99   |
|  |  |  |  | 4250-4500 ms | One-way ANOVA – Bonferroni-Holm corrected | dHP: 232 units; i/vHP: 670 units | 0.83   |
|  |  |  |  | 4500-4750 ms | One-way ANOVA – Bonferroni-Holm corrected | dHP: 232 units; i/vHP: 670 units | 0.27   |
|  |  |  |  | 4750-5000 ms | One-way ANOVA – Bonferroni-Holm corrected | dHP: 232 units; i/vHP: 670 units | 0.0021 |
|  |  |  |  | 5000-5250 ms | One-way ANOVA – Bonferroni-Holm corrected | dHP: 232 units; i/vHP: 670 units | <0.001 |
|  |  |  |  | 5250-5500 ms | One-way ANOVA – Bonferroni-Holm corrected | dHP: 232 units; i/vHP: 670 units | <0.001 |
|  |  |  |  | 5500-5750 ms | One-way ANOVA – Bonferroni-Holm corrected | dHP: 232 units; i/vHP: 670 units | <0.001 |
|  |  |  |  | 5750-6000 ms | One-way ANOVA – Bonferroni-Holm corrected | dHP: 232 units; i/vHP: 670 units | <0.001 |

## B

| Figure | Panel | Title     | Description                                         | Detail                       | Test          | n                             | p      |
|--------|-------|-----------|-----------------------------------------------------|------------------------------|---------------|-------------------------------|--------|
| 2      | B(ii) | Coherence | Coherence between hippocampus and prefrontal cortex | 4-12 Hz                      | t-test        | dHP: 41 mice; i/vHP: 103 mice | <0.001 |
|        |       |           |                                                     | 12-30 Hz                     | t-test        | dHP: 41 mice; i/vHP: 103 mice | <0.001 |
|        |       |           |                                                     | 30-100Hz                     | t-test        | dHP: 41 mice; i/vHP: 103 mice | <0.001 |
|        | C     | gPDC      | gPDC between hippocampus and prefrontal cortex      | 4-12 Hz, PL→dHP & dHP→PL     | paired t-test | 41 mice                       | <0.001 |
|        |       |           |                                                     | 4-12 Hz, PL→i/vHP & i/vHP→PL | paired t-test | 103 mice                      | <0.001 |
|        |       |           |                                                     | 4-12 Hz, PL→dHP & PL→i/vHP   | t-test        | dHP: 41 mice; i/vHP: 103 mice | 0.065  |
|        |       |           |                                                     | 4-12 Hz, dHP→PL & i/vHP→PL   | t-test        | dHP: 41 mice; i/vHP: 103 mice | <0.001 |
|        |       |           |                                                     | 12-30 Hz, PL→dHP & dHP→PL    | paired t-test | 41 mice                       | <0.001 |

|  |  |  |  |                                     |               |                                  |        |
|--|--|--|--|-------------------------------------|---------------|----------------------------------|--------|
|  |  |  |  | 12-30 Hz,<br>PL→i/vHP &<br>i/vHP→PL | paired t-test | 103 mice                         | <0.001 |
|  |  |  |  | 12-30 Hz,<br>PL→dHP &<br>PL→i/vHP   | t-test        | dHP: 41 mice; i/vHP:<br>103 mice | 0.66   |
|  |  |  |  | 12-30 Hz,<br>dHP→PL &<br>i/vHP→PL   | t-test        | dHP: 41 mice; i/vHP:<br>103 mice | 0.16   |

### C

| Figure       | Panel                                     | Title                              | Description                                                                         | Detail       | Test                                      | n                                  | p      |
|--------------|-------------------------------------------|------------------------------------|-------------------------------------------------------------------------------------|--------------|-------------------------------------------|------------------------------------|--------|
| 3            | A(ii)                                     | Power                              | Power between hippocampus and prefrontal cortex aligned to sharpwave-ripple complex | 4-12 Hz      | t-test                                    | dHP: 41 mice; i/vHP:<br>103 mice   | <0.001 |
|              |                                           |                                    |                                                                                     | 12-30 Hz     | t-test                                    | dHP: 41 mice; i/vHP:<br>103 mice   | <0.001 |
|              |                                           |                                    |                                                                                     | 30-100Hz     | t-test                                    | dHP: 41 mice; i/vHP:<br>103 mice   | <0.001 |
|              | C                                         | SUA firingrate                     | SUA firingrate in prefrontal cortex aligned to sharpwave-ripple complex             | 0-250 ms     | One-way ANOVA – Bonferroni-Holm corrected | dHP: 148 units; i/vHP<br>561 units | <0.001 |
|              |                                           |                                    |                                                                                     | 250-500 ms   | One-way ANOVA – Bonferroni-Holm corrected | dHP: 148 units; i/vHP<br>561 units | <0.001 |
|              |                                           |                                    |                                                                                     | 500-750 ms   | One-way ANOVA – Bonferroni-Holm corrected | dHP: 148 units; i/vHP<br>561 units | <0.001 |
|              |                                           |                                    |                                                                                     | 750-1000 ms  | One-way ANOVA – Bonferroni-Holm corrected | dHP: 148 units; i/vHP<br>561 units | <0.001 |
|              |                                           |                                    |                                                                                     | 1000-1250 ms | One-way ANOVA – Bonferroni-Holm corrected | dHP: 148 units; i/vHP<br>561 units | <0.001 |
|              |                                           |                                    |                                                                                     | 1250-1500 ms | One-way ANOVA – Bonferroni-Holm corrected | dHP: 148 units; i/vHP<br>561 units | 0.0042 |
|              |                                           |                                    |                                                                                     | 1500-1750 ms | One-way ANOVA – Bonferroni-Holm corrected | dHP: 148 units; i/vHP<br>561 units | 0.96   |
|              |                                           |                                    |                                                                                     | 1750-2000 ms | One-way ANOVA – Bonferroni-Holm corrected | dHP: 148 units; i/vHP<br>561 units | 0.09   |
|              |                                           |                                    |                                                                                     | 2000-2250 ms | One-way ANOVA – Bonferroni-Holm corrected | dHP: 148 units; i/vHP<br>561 units | 0.16   |
|              |                                           |                                    |                                                                                     | 2250-2500 ms | One-way ANOVA – Bonferroni-Holm corrected | dHP: 148 units; i/vHP<br>561 units | 0.39   |
| 2500-2750 ms | One-way ANOVA – Bonferroni-Holm corrected | dHP: 148 units; i/vHP<br>561 units | 0.009                                                                               |              |                                           |                                    |        |
| 2750-3000 ms | One-way ANOVA – Bonferroni-Holm corrected | dHP: 148 units; i/vHP<br>561 units | <0.001                                                                              |              |                                           |                                    |        |



|  |  |  |  |              |                                           |                                    |        |
|--|--|--|--|--------------|-------------------------------------------|------------------------------------|--------|
|  |  |  |  | 3000-3250 ms | One-way ANOVA – Bonferroni-Holm corrected | dHP: 148 units; i/vHP<br>561 units | <0.001 |
|  |  |  |  | 3250-3500 ms | One-way ANOVA – Bonferroni-Holm corrected | dHP: 148 units; i/vHP<br>561 units | <0.001 |
|  |  |  |  | 3500-3750 ms | One-way ANOVA – Bonferroni-Holm corrected | dHP: 148 units; i/vHP<br>561 units | <0.001 |
|  |  |  |  | 3750-4000 ms | One-way ANOVA – Bonferroni-Holm corrected | dHP: 148 units; i/vHP<br>561 units | <0.001 |
|  |  |  |  | 4000-4250 ms | One-way ANOVA – Bonferroni-Holm corrected | dHP: 148 units; i/vHP<br>561 units | <0.001 |
|  |  |  |  | 4250-4500 ms | One-way ANOVA – Bonferroni-Holm corrected | dHP: 148 units; i/vHP<br>561 units | <0.001 |
|  |  |  |  | 4500-4750 ms | One-way ANOVA – Bonferroni-Holm corrected | dHP: 148 units; i/vHP<br>561 units | <0.001 |
|  |  |  |  | 4750-5000 ms | One-way ANOVA – Bonferroni-Holm corrected | dHP: 148 units; i/vHP<br>561 units | <0.001 |
|  |  |  |  | 5000-5250 ms | One-way ANOVA – Bonferroni-Holm corrected | dHP: 148 units; i/vHP<br>561 units | <0.001 |
|  |  |  |  | 5250-5500 ms | One-way ANOVA – Bonferroni-Holm corrected | dHP: 148 units; i/vHP<br>561 units | <0.001 |
|  |  |  |  | 5500-5750 ms | One-way ANOVA – Bonferroni-Holm corrected | dHP: 148 units; i/vHP<br>561 units | <0.001 |
|  |  |  |  | 5750-6000 ms | One-way ANOVA – Bonferroni-Holm corrected | dHP: 148 units; i/vHP<br>561 units | <0.001 |

## D

| Figure | Panel | Title              | Description                                | Detail | Test          | n      | p      |
|--------|-------|--------------------|--------------------------------------------|--------|---------------|--------|--------|
| 4      | A     | retrograde tracing | Retrograde labelled neurons in dHP & i/vHP |        | paired t-test | 8 mice | <0.001 |

## E

| Figure | Panel | Title | Description                                         | Detail                                                | Test              | n       | p    |
|--------|-------|-------|-----------------------------------------------------|-------------------------------------------------------|-------------------|---------|------|
| 5      | D(ii) | Power | power response in PL during light stimulation in HP | PL_Power(dHP stimulation); 4-12 Hz, 4 Hz stimulation  | One-sample t-test | 22 mice | 0.76 |
|        |       |       |                                                     | PL_Power(dHP stimulation); 4-12 Hz, 8 Hz stimulation  | One-sample t-test | 22 mice | 0.33 |
|        |       |       |                                                     | PL_Power(dHP stimulation); 4-12 Hz, 16 Hz stimulation | One-sample t-test | 22 mice | 0.95 |

|  |  |  |  |                                                         |                   |         |       |
|--|--|--|--|---------------------------------------------------------|-------------------|---------|-------|
|  |  |  |  | PL_Power(dHP stimulation); 12-30 Hz, 4 Hz stimulation   | One-sample t-test | 22 mice | 0.17  |
|  |  |  |  | PL_Power(dHP stimulation); 12-30 Hz, 8 Hz stimulation   | One-sample t-test | 22 mice | 0.28  |
|  |  |  |  | PL_Power(dHP stimulation); 12-30 Hz, 16 Hz stimulation  | One-sample t-test | 22 mice | 0.64  |
|  |  |  |  | PL_Power(dHP stimulation); 30-100 Hz, 4 Hz stimulation  | One-sample t-test | 22 mice | 1     |
|  |  |  |  | PL_Power(dHP stimulation); 30-100 Hz, 8 Hz stimulation  | One-sample t-test | 22 mice | 0.64  |
|  |  |  |  | PL_Power(dHP stimulation); 30-100 Hz, 16 Hz stimulation | One-sample t-test | 22 mice | 0.28  |
|  |  |  |  | PL_Power(i/vHP stimulation); 4-12 Hz, 4 Hz stimulation  | One-sample t-test | 9 mice  | 0.51  |
|  |  |  |  | PL_Power(i/vHP stimulation); 4-12 Hz, 8 Hz stimulation  | One-sample t-test | 9 mice  | 0.039 |
|  |  |  |  | PL_Power(i/vHP stimulation); 4-12 Hz, 16 Hz stimulation | One-sample t-test | 9 mice  | 0.096 |
|  |  |  |  | PL_Power(i/vHP stimulation); 12-30 Hz, 4 Hz stimulation | One-sample t-test | 9 mice  | 0.61  |
|  |  |  |  | PL_Power(i/vHP stimulation); 12-30 Hz, 8 Hz stimulation | One-sample t-test | 9 mice  | 0.03  |

|  |  |  |  |                                                                       |                   |        |        |
|--|--|--|--|-----------------------------------------------------------------------|-------------------|--------|--------|
|  |  |  |  | PL_Power(i/vHPH<br>P stimulation); 12-<br>30 Hz, 16 Hz<br>stimulation | One-sample t-test | 9 mice | 0.17   |
|  |  |  |  | PL_Power(i/vHPH<br>P stimulation); 30-<br>100 Hz, 4 Hz<br>stimulation | One-sample t-test | 9 mice | 0.58   |
|  |  |  |  | PL_Power(i/vHPH<br>P stimulation); 30-<br>100 Hz, 8 Hz<br>stimulation | One-sample t-test | 9 mice | 0.0036 |
|  |  |  |  | PL_Power(i/vHPH<br>stimulation); 30-<br>100 Hz, 16 Hz<br>stimulation  | One-sample t-test | 9 mice | 0.80   |

## F

| Figure | Panel | Title     | Description                                                                     | Detail                                              | Test          | n      | p      |
|--------|-------|-----------|---------------------------------------------------------------------------------|-----------------------------------------------------|---------------|--------|--------|
| S1     | A     | Power     | Power in hippocampus with and without anesthesia                                | 4-12 Hz                                             | paired t-test | 9 mice | 0.0039 |
|        |       |           |                                                                                 | 12-30 Hz                                            | paired t-test | 9 mice | 0.0078 |
|        |       |           |                                                                                 | 30-100 Hz                                           | paired t-test | 9 mice | 0.0039 |
|        | B     | Coherence | Coherence between hippocampus and prefrontal cortex with and without anesthesia | 4-12 Hz                                             | paired t-test | 9 mice | 0.61   |
|        |       |           |                                                                                 | 12-30 Hz                                            | paired t-test | 9 mice | 0.39   |
|        |       |           |                                                                                 | 30-100 Hz                                           | paired t-test | 9 mice | 0.48   |
|        | C     | gPDC      | gPDC between hippocampus and prefrontal cortex with and without anesthesia      | 4-12 Hz, No Anesthesia<br>PL→i/vHP & i/vHP→PL       | paired t-test | 9 mice | 0.027  |
|        |       |           |                                                                                 | 4-12 Hz, Urethane anesthesia<br>PL→i/vHP & i/vHP→PL | paired t-test | 9 mice | 0.075  |
|        |       |           |                                                                                 | 4-12 Hz, PL→i/vHP anesthesia & urethane anesthesia  | paired t-test | 9 mice | 0.18   |

|           |       |                    |                                                                          |                                                                |                                         |        |        |
|-----------|-------|--------------------|--------------------------------------------------------------------------|----------------------------------------------------------------|-----------------------------------------|--------|--------|
|           |       |                    |                                                                          | 4-12 Hz,<br>i/vHP→PL<br>anesthesia &<br>urethane<br>anesthesia | paired t-test                           | 9 mice | 0.78   |
|           |       |                    |                                                                          | 12-30 Hz,<br>PL→dHP &<br>dHP→PL                                | paired t-test                           | 9 mice | 0.045  |
|           |       |                    |                                                                          | 12-30 Hz,<br>PL→i/vHP &<br>i/vHP→PL                            | paired t-test                           | 9 mice | 0.0088 |
|           |       |                    |                                                                          | 12-30 Hz,<br>PL→dHP &<br>PL→i/vHP                              | paired t-test                           | 9 mice | 0.093  |
|           |       |                    |                                                                          | 12-30 Hz,<br>dHP→PL &<br>i/vHP→PL                              | paired t-test                           | 9 mice | 0.77   |
|           | D(i)  | Log MUA firingrate | Firingrate of MUA in hippocampus                                         |                                                                | paired t-test                           | 9 mice | 0.65   |
|           | D(ii) | Phase-locking      | Phase-locking of hippocampal MUA to local field potential in hippocampus | 4-12 Hz                                                        | Wilcoxon rank sumtest for equal medians | 9 mice | 0.16   |
| 12-30 Hz  |       |                    |                                                                          | Wilcoxon rank sumtest for equal medians                        | 9 mice                                  | 0.91   |        |
| 30-100 Hz |       |                    |                                                                          | Wilcoxon rank sumtest for equal medians                        | 9 mice                                  | 1      |        |

### G

| Figure | Panel | Title     | Description                          | Detail    | Test   | n                             | p      |
|--------|-------|-----------|--------------------------------------|-----------|--------|-------------------------------|--------|
| S2     | A     | Amplitude | Theta burst amplitude in hippocampus |           | t-test | dHP: 41 mice; i/vHP: 103 mice | 0.015  |
|        |       | Duration  | Theta burst duration in hippocampus  |           | t-test | dHP: 41 mice; i/vHP: 103 mice | <0.001 |
|        | B     | Power     | beta power in hippocampus            | 12-30 Hz  | t-test | dHP: 41 mice; i/vHP: 103 mice | 0.22   |
|        |       |           | gamma power in hippocampus           | 30-100 Hz | t-test | dHP: 41 mice; i/vHP: 103 mice | 0.073  |

### H

| Figure | Panel | Title | Description                                         | Detail                                               | Test              | n       | p    |
|--------|-------|-------|-----------------------------------------------------|------------------------------------------------------|-------------------|---------|------|
| S4     |       | Power | power response in PL during light stimulation in HP | PL_Power(dHP stimulation); 4-12 Hz, 4 Hz stimulation | One-sample t-test | 10 mice | 0.46 |

|  |  |  |  |                                                         |                   |         |      |
|--|--|--|--|---------------------------------------------------------|-------------------|---------|------|
|  |  |  |  | PL_Power(dHP stimulation); 4-12 Hz, 8 Hz stimulation    | One-sample t-test | 10 mice | 0.65 |
|  |  |  |  | PL_Power(dHP stimulation); 4-12 Hz, 16 Hz stimulation   | One-sample t-test | 10 mice | 0.55 |
|  |  |  |  | PL_Power(dHP stimulation); 12-30 Hz, 4 Hz stimulation   | One-sample t-test | 10 mice | 0.39 |
|  |  |  |  | PL_Power(dHP stimulation); 12-30 Hz, 8 Hz stimulation   | One-sample t-test | 10 mice | 0.98 |
|  |  |  |  | PL_Power(dHP stimulation); 12-30 Hz, 16 Hz stimulation  | One-sample t-test | 10 mice | 0.32 |
|  |  |  |  | PL_Power(dHP stimulation); 30-100 Hz, 4 Hz stimulation  | One-sample t-test | 10 mice | 0.22 |
|  |  |  |  | PL_Power(dHP stimulation); 30-100 Hz, 8 Hz stimulation  | One-sample t-test | 10 mice | 0.11 |
|  |  |  |  | PL_Power(dHP stimulation); 30-100 Hz, 16 Hz stimulation | One-sample t-test | 10 mice | 0.46 |
|  |  |  |  | PL_Power(i/vHP stimulation); 4-12 Hz, 4 Hz stimulation  | One-sample t-test | 5 mice  | 0.46 |
|  |  |  |  | PL_Power(i/vHP stimulation); 4-12 Hz, 8 Hz stimulation  | One-sample t-test | 5 mice  | 0.35 |
|  |  |  |  | PL_Power(i/vHP stimulation); 4-12 Hz, 16 Hz stimulation | One-sample t-test | 5 mice  | 0.24 |

|  |  |  |  |                                                             |                   |        |      |
|--|--|--|--|-------------------------------------------------------------|-------------------|--------|------|
|  |  |  |  | PL_Power(i/vHP stimulation); 12-30 Hz, 4 Hz stimulation     | One-sample t-test | 5 mice | 0.74 |
|  |  |  |  | PL_Power(i/vHPH P stimulation); 12-30 Hz, 8 Hz stimulation  | One-sample t-test | 5 mice | 0.85 |
|  |  |  |  | PL_Power(i/vHPH P stimulation); 12-30 Hz, 16 Hz stimulation | One-sample t-test | 5 mice | 0.57 |
|  |  |  |  | PL_Power(i/vHPH P stimulation); 30-100 Hz, 4 Hz stimulation | One-sample t-test | 5 mice | 0.35 |
|  |  |  |  | PL_Power(i/vHPH P stimulation); 30-100 Hz, 8 Hz stimulation | One-sample t-test | 5 mice | 0.56 |
|  |  |  |  | PL_Power(i/vHP stimulation); 30-100 Hz, 16 Hz stimulation   | One-sample t-test | 5 mice | 0.49 |
